# Supplementary material for: Prevalence and associated factors of preterm birth in Ethiopia: systematic review and meta-analysis protocol
Source: PubMed Central journal article supplement — BMJ Open. 2020 May 12;10(5):e035574. doi: 10.1136/bmjopen-2019-035574 (PMC7228533; doi:10.1136/bmjopen-2019-035574), 2020-05-12
Supplement: bmjopen-2019-035574.draft_revisions.pdf [file bmjopen-2019-035574.draft_revisions.pdf]

# BMJ Open

BMJ Open is committed to open peer review. As part of this commitment we make the peer review history of every article we publish publicly available.

When an article is published we post the peer reviewers' comments and the authors' responses online. We also post the versions of the paper that were used during peer review. These are the versions that the peer review comments apply to.

The versions of the paper that follow are the versions that were submitted during the peer review process. They are not the versions of record or the final published versions. They should not be cited or distributed as the published version of this manuscript.

BMJ Open is an open access journal and the full, final, typeset and author-corrected version of record of the manuscript is available on our site with no access controls, subscription charges or pay-per-view fees (<http://bmjopen.bmj.com>).

If you have any questions on BMJ Open's open peer review process please email [info.bmjopen@bmj.com](mailto:info.bmjopen@bmj.com)

# BMJ Open

## The prevalence and associated factors of preterm birth in Ethiopia: Systematic review and meta-analysis protocol

|                               |                                                                                                                                                                                                                                                                                                                                                                                                                                                                                                                                                                                                                                                               |
|-------------------------------|---------------------------------------------------------------------------------------------------------------------------------------------------------------------------------------------------------------------------------------------------------------------------------------------------------------------------------------------------------------------------------------------------------------------------------------------------------------------------------------------------------------------------------------------------------------------------------------------------------------------------------------------------------------|
| Journal:                      | <i>BMJ Open</i>                                                                                                                                                                                                                                                                                                                                                                                                                                                                                                                                                                                                                                               |
| Manuscript ID                 | bmjopen-2019-035574                                                                                                                                                                                                                                                                                                                                                                                                                                                                                                                                                                                                                                           |
| Article Type:                 | Protocol                                                                                                                                                                                                                                                                                                                                                                                                                                                                                                                                                                                                                                                      |
| Date Submitted by the Author: | 06-Nov-2019                                                                                                                                                                                                                                                                                                                                                                                                                                                                                                                                                                                                                                                   |
| Complete List of Authors:     | Muchie, Kindie Fentahun; Bahir Dar University, Epidemiology and Biostatistics<br>Molla, Ayenew; University of Gondar College of Medicine and Health Sciences, Epidemiology and Biostatistics;<br>Teshome, Destaw; University of Gondar College of Medicine and Health Sciences, Epidemiology and Biostatistics<br>Yenit, Melaku; University of Gondar, Epidemiology and Biostatistics<br>Sisay, Malede; University of Gondar College of Medicine and Health Sciences, Epidemiology and Biostatistics<br>Mekonnen, Fantahun Ayenew ; University of Gondar, Epidemiology and Biostatistics<br>Habitu, Yohanes Ayanaw; University of Gondar, Reproductive Health |
| Keywords:                     | EPIDEMIOLOGY, PUBLIC HEALTH, STATISTICS & RESEARCH METHODS                                                                                                                                                                                                                                                                                                                                                                                                                                                                                                                                                                                                    |
|                               |                                                                                                                                                                                                                                                                                                                                                                                                                                                                                                                                                                                                                                                               |

SCHOLARONE™  
Manuscripts

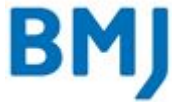

I, the Submitting Author has the right to grant and does grant on behalf of all authors of the Work (as defined in the below author licence), an exclusive licence and/or a non-exclusive licence for contributions from authors who are: i) UK Crown employees; ii) where BMJ has agreed a CC-BY licence shall apply, and/or iii) in accordance with the terms applicable for US Federal Government officers or employees acting as part of their official duties; on a worldwide, perpetual, irrevocable, royalty-free basis to BMJ Publishing Group Ltd ("BMJ") its licensees and where the relevant Journal is co-owned by BMJ to the co-owners of the Journal, to publish the Work in this journal and any other BMJ products and to exploit all rights, as set out in our [licence](#).

The Submitting Author accepts and understands that any supply made under these terms is made by BMJ to the Submitting Author unless you are acting as an employee on behalf of your employer or a postgraduate student of an affiliated institution which is paying any applicable article publishing charge ("APC") for Open Access articles. Where the Submitting Author wishes to make the Work available on an Open Access basis (and intends to pay the relevant APC), the terms of reuse of such Open Access shall be governed by a Creative Commons licence – details of these licences and which [Creative Commons](#) licence will apply to this Work are set out in our licence referred to above.

Other than as permitted in any relevant BMJ Author's Self Archiving Policies, I confirm this Work has not been accepted for publication elsewhere, is not being considered for publication elsewhere and does not duplicate material already published. I confirm all authors consent to publication of this Work and authorise the granting of this licence.

## The prevalence and associated factors of preterm birth in Ethiopia: Systematic review and meta-analysis protocol

Kindie Fentahun Muchie<sup>1\*</sup>, Melaku Kindie Yenit<sup>2</sup>, Destaw Fetene Teshome<sup>2</sup>, Ayenew Molla Lakew<sup>2</sup>, Malede Mekuanint Sisay<sup>2</sup>, Fantahun Ayenew Mekonnen<sup>2</sup>, Yohanes Ayanaw Habitu<sup>3</sup>

<sup>1</sup>Department of Epidemiology and Biostatistics, School of Public Health, College of Medicine and Health Sciences, Bahir Dar University, Bahir Dar, Ethiopia

<sup>2</sup>Department of Epidemiology and Biostatistics, Institute of Public Health, College of Medicine and Health Sciences, University of Gondar, Gondar, Ethiopia

<sup>3</sup>Department of Reproductive Health, Institute of Public Health, College of Medicine and Health Sciences, University of Gondar, Gondar, Ethiopia

### E-mail addresses:

KFM ([mkindief@gmail.com](mailto:mkindief@gmail.com)), MKY ([melaku98@gmail.com](mailto:melaku98@gmail.com)), DFT ([destaw.fetene@gmail.com](mailto:destaw.fetene@gmail.com)), AML ([mayenew15@gmail.com](mailto:mayenew15@gmail.com)), MMS ([maledecsa@gmail.com](mailto:maledecsa@gmail.com)), FAM ([fantahun.ayenew@yahoo.com](mailto:fantahun.ayenew@yahoo.com)), YAH ([ayanawyohanes@yahoo.com](mailto:ayanawyohanes@yahoo.com))

### \*Correspondence

## ABSTRACT

**Introduction:** Preterm birth complications are the leading cause of death among neonates globally. The reduction in neonatal mortality is not remarkable in Ethiopia. Therefore, this review is aimed at assessing the magnitude and associated factors of preterm birth in Ethiopia.

**Methods and analysis:** The preferred reporting items for systematic reviews and meta-analyses guideline will be followed during the systematic review. We will include all observational studies published from Jan 01, 2009 to Dec 31, 2019 that examined the level and/or associated factors of preterm birth in Ethiopia. Electronic databases such as PubMed, and Science Direct as well as Google search engine and Google Scholar will be searched. The pooled prevalence of preterm and effect size of association for associated factors will be analyzed using the Stata software version 14. The heterogeneity between studies will be measured by  $I^2$  statistics. A random-effects model will be used to estimate if heterogeneity detected among studies. Publication bias will be assessed using a funnel plot. Forest plots will be used to present the combined estimate with 95% confidence intervals. The quality of evidence of the outcomes will be assessed with the GRADE approach.

**Ethics and dissemination:** No ethical approval is necessary for a systematic review. The findings will be published in a peer-reviewed journal.

**PROSPERO registration number:** CRD42017077356.

**Keywords:** Preterm birth, Prevalence, Associated Factors, Ethiopia, Systematic review, Meta-analysis

## STRENGTHS AND LIMITATIONS OF THIS STUDY

- The proposed systematic review focuses on preterm birth, the global leading cause of neonatal mortality, in Ethiopia where the reduction in neonatal mortality is not remarkable
- This proposed systematic review and meta-analysis will provide updated knowledge on the prevalence of preterm birth in Ethiopia.
- The proposed systematic review with meta-analysis will provide a comprehensive knowledge on the associated factors of preterm birth in Ethiopia.
- The preferred reporting items for systematic reviews and meta-analyses (PRISMA) guideline will be followed during the proposed systematic review.
- Standard tool for critical appraisal and data extraction will be used
- Only quantitative observational studies published in English will be included.

## INTRODUCTION

Preterm birth is a birth before 37 completed weeks of gestation (1). It is more prevalent in Africa and Asia. Preterm birth complications remained the leading cause of under-5 and neonatal mortalities. Preterm birth, the majority being spontaneously, occurs for a variety of reasons(2). Currently, World Health Organization (WHO) is committed to reduce the health problems and lives lost as a result of preterm births.

Globally, 14.9 million babies born preterm making a birth rate of 11.1%, ranging from 5% to 18%, in 2010 (3). The majority (60%) of these births occurred in sub-Saharan Africa and South Asia where 52% of global livebirths occur. The estimated global preterm birth rate was also 10.6%, 14.84 million live preterm births, in 2014 (4). Twelve million (81.1%) of these preterm births occurred in Asia and sub-Saharan Africa (4) showing the contribution is raised from 2010. Ethiopia is one of the low-middle incomes countries in Sub-Saharan Africa.

Preterm birth remains a crucial issue in child mortality and improving quality of maternal and newborn care(4). Complications of preterm birth is the leading cause of death among under 5 children with risk of dying ranged between 1.9 and 155.1 per 1,000 livebirths , in 2015 (5). In the same report, it had been found as the leading cause of death among neonates contributing for 0.944 million deaths. Complication of infants born preterm result in significant cost to the health sector, parents and the society in that preterm neonates take the first place for neonatal intensive care unit (NICU) admission and longer hospital stay globally (4).

Currently, WHO is committed to reduce the health problems and lives lost as a result of preterm births (6). Hence, WHO had developed new guidelines including interventions

1  
2  
3 provided to the mother and the newborn baby (6). The Every Woman Every  
4 Child movement is also aiming to intensify national and international commitment and  
5 action to ensure that women, children and adolescents are at the heart of development.  
6  
7  
8  
9  
10 The movement puts into action the global strategy (2016-2030) (7). The strategy is aimed  
11 to end all preventable deaths of women, children and adolescents within a generation  
12 and ensuring their well-being. Though Ethiopia achieved the millennium development  
13 goal 4 with 67% under-five mortality reduction from the 1990 estimate, the reduction in  
14 neonatal mortality is not remarkable (8). However, Ethiopia has planned to reduce  
15 neonatal mortality rate from 28 in 2015/16 to 10 by 2019/2020 (9). Furthermore, the  
16 country is also devoted to end preventable deaths of newborns and children under 5 years  
17 of age by 2030 (10).  
18  
19  
20  
21  
22  
23  
24  
25  
26  
27

28 There are local studies on preterm conducted in Ethiopia. The need for an accurate and  
29 reliable result (11, 12), a single study aggregating these studies is necessary for policy  
30 makers and implementers. Even though, there is a systematic review (13) done, it  
31 addressed only the effect of pregnancy induced hypertension and multiple pregnancies  
32 on preterm birth. However, literatures show that more factors affect preterm birth. Some  
33 of the identified associated factors of preterm birth in Ethiopia are pregnancy induced  
34 hypertension (14, 15), chronic illness (14, 16), obstetric complication (17), nutritional  
35 status (17), anemia (16), antenatal care follow up (15-17), substance intake during  
36 pregnancy (18), history of abortion (18), history of still birth (18), premature rupture of  
37 membrane (16, 18), hypertension during pregnancy (18), multiple gestation (15, 18),  
38 history of low birth weight (18), history of preterm birth (18), and income status (16).  
39  
40  
41  
42  
43  
44  
45  
46  
47  
48  
49  
50  
51  
52  
53  
54  
55  
56  
57  
58  
59  
60



Hence, conducting a systematic review and meta-analysis on preterm birth is paramount important in Ethiopia by updating the latest possible evidences.

Therefore this review is aimed at assessing the magnitude and associated factors of preterm birth among in Ethiopia.

## **METHODS AND ANALYSIS**

### **Development of the review method**

The methods of this systematic review and meta-analysis protocol was developed based on the PRISMA Protocols (PRISMA-P) 2015 statement (19). The preferred reporting items for systematic reviews and meta-analyses (PRISMA) guideline will be followed during the systematic review(20, 21). The result of the review will be reported according to the PRISMA guideline for reporting (22). The four phases that were drawn from the PRISMA flow chart (23) will be documented in the results to show the study selection process from initially identified records to finally included studies. The protocol for this systematic review and meta-analysis is registered in international prospective register of systematic reviews (PROSPERO) and obtained the registration number (CRD42017064585).

### **Eligibility criteria**

We will include all observational studies that examined the level and/or associated factors of preterm birth in Ethiopia. Reviews, editorials, case series and case reports on preterm birth as well as studies that only reported qualitative findings on preterm birth will be excluded. In studies that reported both quantitative and qualitative results, we will only consider the quantitative findings. Studies will be considered relevant if they assessed the magnitude of preterm birth and/or examined the associated factors of preterm birth.

## Search strategy

Major medical electronic databases such as PubMed, and Science Direct will be searched to identify relevant literature for the review. To cover grey literature, we will hand-search literature using the Google search engine and Google Scholar and references of electronically identified articles. Further, references list will also be considered from relevant studies considered for critical appraisal.

The literature search will be carried out by the primary author (KFM). The search will be limited to humans, and journal studies published in English from Jan 01, 2009 to Dec 31, 2020. We will apply Medical Subject Headings (MeSH) terms from PubMed, and combined key words to identify studies in the databases.

Accordingly, literatures will be retrieved using the exact search phrase (*"Premature Birth/epidemiology"[Mesh] OR "Premature Birth/etiology"[Mesh] OR "Premature Birth/statistics and numerical data"[Mesh] OR premature birth\* [MeSH] OR preterm birth OR premature birth OR preterm labo\* OR preterm deliver\* OR preterm infant OR preterm neonate\* OR preterm newborn\* OR birth outcome OR pregnancy outcome\$ OR pregnancy complication\$ OR birth outcome\$ OR birth complication\$) AND Ethiopia AND ((incidence OR prevalence OR magnitude OR burden) OR (predict\* OR associated factor\* OR risk factor\* OR determinant\*))*) from PubMed. This will be customized for other databases.

## Study selection process

The retrieved studies will be exported to the citation manager (EndNote) and then duplicates excluded. The titles and abstracts of the studies will be reviewed for screening by two authors (KFM and AML) for obvious exclusion according to the inclusion criteria.

1  
2  
3 Based on this screening, the titles and abstracts of the studies will be classified as  
4 included, excluded, and undecided. Full text of all the included and the undecided studies  
5 will be searched for further eligibility assessment.  
6  
7

8  
9  
10 The full texts of the included and undecided categories of the studies will be independently  
11 reviewed by two authors (KFM and AML) against the eligibility criteria for final inclusion.  
12

13  
14 Studies that are not eligible based on the examination of the full-text will be excluded by  
15 stating the reasons according to the inclusion criteria. Disagreements between the two  
16 reviewers will be resolved through discussion and consensus.  
17  
18

19  
20 Studies deemed to be appropriate will be scanned in full to determine relevance.  
21

22  
23 Secondly, the references lists of all relevant studies will be reviewed to find additional  
24 studies that may have been difficult to detect in the database search due to non-reporting  
25 in the abstract (possibly due to non-significant effects). Studies published by the same  
26 team will be carefully reviewed to ensure the results of a given study are not included  
27 twice in this review.  
28  
29  
30  
31  
32  
33

### 34 35 **Critical appraisal**

36  
37 All of the included studies will be critically appraised for their validity. The three authors  
38 (DFT, MKY, FA) will check the methodological robustness and validity of the findings  
39 using the Joanna Briggs Institute (JBI) Meta-Analysis of Statistics Assessment and  
40 Review Instrument (24). Uncertainties will be resolved by joint discussion between the  
41 reviewers. Disagreements among the reviewers will be resolved through discussion and  
42 consensus.  
43  
44  
45  
46  
47  
48  
49

50  
51 The JBI Meta-Analysis of Statistics Assessment and Review Instrument (JBI-MAStARI)  
52 will be used for critical appraisal (25). This tool contains a separate appraisal checklist for  
53  
54  
55  
56  
57

1  
2  
3 each type of the study design. The reviewers will independently assess articles prior to  
4 inclusion in the final review using this instrument. Any disagreement among the reviewers  
5 will be resolved through discussion, and by involving another reviewer. A Study with  
6 quality assessment score of 50% and above and a study having a response rate of 80%  
7 and above were included in the final review.  
8  
9

### 14 **Data extraction**

15  
16 The JBI data extraction form will be used to extract the characteristics of the studies and  
17 prevalence of preterm birth (primary outcome) as well as Odds ratio (secondary  
18 outcomes). A standardized excel sheet will be created and information from the  
19 standardized review forms will be transferred in order to be readily available for the  
20 systematic review. Three reviewers (KFM, MMS and AML) will extract data  
21 independently. Disagreements among the reviewers were resolved through discussion  
22 and consensus.  
23  
24  
25  
26  
27  
28  
29  
30  
31  
32

33 This tool will include information on the author, year of publication, objective, study  
34 setting, year of survey, study design, sample size, data collection method, study  
35 participants, definition used for preterm birth, prevalence of preterm, 95% CI for  
36 prevalence of preterm birth, and list of associated factors with their effect size. A  
37 quantitative data of cross-tabulation between the subject's characteristics (associated  
38 factors) and the preterm birth will also systematically abstracted.  
39  
40  
41  
42  
43  
44  
45

### 46 **Data synthesis and statistical analysis**

47  
48 The individual studies will be concisely described using a summary table. The summary  
49 table particularly describes the characteristics of the included studies and the main  
50 findings.  
51  
52  
53  
54  
55  
56  
57

1  
2  
3 The data will be analyzed by the Stata software version 14. For studies which did not  
4 present a standard error (SE), it will be calculated using the formula;  $SE = \sqrt{(p \times (1-p)/n)}$ .  
5  
6 The calculated standard error and prevalence rate of each study will then entered into  
7  
8 Stata software to calculate the overall prevalence and its 95% confidence interval (CI).  
9  
10 Similarly, the relationship between factors and preterm birth will be summarized using  
11  
12 statistical estimates of effect sizes, odds ratio.  
13  
14

15  
16 The level of heterogeneity among the studies will be quantified using the  $I^2$  statistics (26).  
17  
18 Meta-analysis using random effects model will be conducted for the  $I^2$  value of more than  
19  
20 75%, considered as heterogeneity. Publication bias will be assessed using a funnel plot.  
21  
22 Subgroup analysis will be sought based on possible characteristics of the studies. Forest plots  
23  
24 will be used to present the combined estimate with 95% CI. The quality of evidence of the  
25  
26 outcomes will be assessed with the GRADE approach. If no more than one study will be  
27  
28 found for each of the objective, then the finding will be synthesized narratively.  
29  
30  
31

### 32 **Potential limitations**

33  
34 Only quantitative observational studies published in English will be included. This might  
35  
36 excluded studies those published in other languages. Further, qualitative studies that may  
37  
38 assessed the associated factors might be excluded. Therefore, the readers are advised  
39  
40 to take this into account.  
41  
42  
43

### 44 **Patient and public involvement**

45  
46 It was not appropriate to involve patients or the public in the design, or conduct, or  
47  
48 reporting, or dissemination plans of our research as no individual information will be  
49  
50 discussed.  
51  
52  
53

### 54 **Ethics and dissemination**

1  
2  
3 The review will be based on published data, and thus there is no requirement for ethical  
4 approval. The results will be disseminated through publication in a peer reviewed journal,  
5  
6 and through presentations at academic conferences.  
7  
8

## 9 10 **DISCUSSION**

11  
12 It is crucial to know the importance of preterm birth and contributing factors considering  
13 the latest statistics in a country. Hence, this review will present on the country wide  
14 magnitude of preterm birth and the associated factors of preterm birth. The result will  
15 provide information to guide health professionals and health policy makers for monitoring  
16 preterm birth strategy and applying necessary preventive and appropriate measures to  
17 decrease preterm birth.  
18  
19  
20  
21  
22  
23  
24  
25

## 26 **Abbreviations**

27  
28 ACTION: Antenatal Corticosteroids for Improving Outcomes in preterm Newborns

29  
30 CI: Confidence Interval

31  
32 JBI: Joanna Briggs Institute

33  
34 JBI-MASARI: JBI Meta-Analysis of Statistics Assessment and Review Instrument

35  
36 KMC: Kangaroo Mother Care

37  
38 LMICs: Low and Middle Income Countries

39  
40 MeSH: Medical Subject Headings

41  
42 NICU: Neonatal Intensive Care Unit

43  
44 NMR: Neonatal Mortality Rate

45  
46 PRISMA: Preferred Reporting Items for Systematic Reviews and Meta-analyses

47  
48 PRISMA-P: Preferred Reporting Items for Systematic Reviews and Meta-analyses  
49  
50  
51  
52  
53  
54 Protocol

PROSPERO: Prospective Register of Systematic Reviews

SE: Standard Error

WHO: World Health Organization

## **Declarations**

### ***Consent for publication***

Not applicable.

### ***Availability of data and materials***

Not applicable.

### ***Competing interests***

The authors declare that they have no competing interests

### ***Funding***

None.

### ***Author contributions***

KFM, MKY, YAH contributed to the conception of the research protocol. KFM, AML, DFT, MMS, FAM designed the study. KFM, DFT, AML reviewed the literature, and wrote the protocol. KFM, AML, DFT, MKY, FAM, MMS, and YAH reviewed and rewrote the protocol. All authors read and approved the final manuscript.

## **References**

1. Who: Recommended Definitions, Terminology and Format for Statistical Tables Related to The Perinatal Period And Use of A New Certificate For Cause of Perinatal Deaths. *Acta obstetricia et gynecologica Scandinavica*. 1977;56(3):247-53.
2. March of Dimes, PMNCH, Save the Children, WHO. Born Too Soon: The Global action report on preterm Birth. In: Eds CP Howson, MV Kinney, JE Lawn, editors. Geneva: World Health Organization; 2012.

3. Blencowe H, Cousens S, Oestergaard MZ, Chou D, Moller A-B, Narwal R, et al. National, regional, and worldwide estimates of preterm birth rates in the year 2010 with time trends since 1990 for selected countries: a systematic analysis and implications. *The Lancet*. 2012;379(9832):2162-72.
4. Chawanpaiboon S, Vogel JP, Moller A-B, Lumbiganon P, Petzold M, Hogan D, et al. Global, regional, and national estimates of levels of preterm birth in 2014: a systematic review and modelling analysis. *The Lancet Global Health*. 2019;7(1):e37-e46.
5. Liu L, Oza S, Hogan D, Chu Y, Perin J, Zhu J, et al. Global, regional, and national causes of under-5 mortality in 2000-15: an updated systematic analysis with implications for the Sustainable Development Goals. *The Lancet*. 2016;388(10063):3027-35.
6. WHO. WHO Fact sheets on Preterm birth In: WHO, editor. 2018.
7. Every Woman Every Child. The global strategy for women's, children's, and adolescents' health (2016-2030): Survive, thrive, transform. In: Every Woman Every Child, editor. 2015.
8. Ruducha J, Mann C, Singh NS, Gemebo TD, Tessema NS, Baschieri A, et al. How Ethiopia achieved Millennium Development Goal 4 through multisectoral interventions: a Countdown to 2015 case study. *The Lancet Global Health*. 2017;5(11):e1142-e51.
9. The Federal Democratic Republic of Ethiopia Ministry of Health. Health Sector Transformation Plan. 2015.
10. United Nations. Sustainable Development Goals. Secretary-General. 2015.
11. Cohn LD, Becker BJ. How meta-analysis increases statistical power. *Psychological Methods*. 2003;8(3):243-53.
12. Noble JH, Jr. Meta-analysis: Methods, strengths, weaknesses, and political uses. *The Journal of Laboratory and Clinical Medicine*. 2006;147(1):7-20.
13. Mulualem G, Wondim A, Woretaw A. The effect of pregnancy induced hypertension and multiple pregnancies on preterm birth in Ethiopia: a systematic review and meta-analysis. *BMC research notes*. 2019;12(1):91.
14. Gebreslasie K. Preterm Birth and Associated Factors among Mothers Who Gave Birth in Gondar Town Health Institutions. *Advances in Nursing*. 2016;2016.



15. Teklay G, Teshale T, Tasew H, Mariye T, Berihu H, Zeru T. Risk factors of preterm birth among mothers who gave birth in public hospitals of central zone, Tigray, Ethiopia: unmatched case–control study 2017/2018. *BMC research notes*. 2018;11(1):571.
16. Bekele T, Amanon A, Gebreslasie KZ. Preterm birth and associated factors among mothers who gave birth in Debremarkos-town health institutions 2013 institutional basedcrosssectional study. *Gynecology & Obstetrics (Sunnyvale)* 2015;5(5).
17. Mekonen DG, Yismaw AE, Nigussie TS, Ambaw WM. Proportion of Preterm birth and associated factors among mothers who gave birth in Debretabor town health institutions, northwest, Ethiopia. *BMC research notes*. 2019;12(1):2.
18. Bekele I, Demeke T, Dugna K. Prevalence of Preterm Birth and its Associated Factors among Mothers Delivered in Jimma University Specialized Teaching and Referral Hospital, Jimma Zone, Oromia Regional State, South West Ethiopia. *Journal of Women's Health Care*. 2017;6(1).
19. Moher D, Shamseer L, Clarke M, Ghersi D, Liberati A, Petticrew M, et al. Preferred reporting items for systematic review and meta-analysis protocols (PRISMA-P) 2015 statement. *Systematic Reviews*. 2015;4(1).
20. Moher D, Liberati A, Tetzlaff J, Altman DG. Preferred reporting items for systematic reviews and meta-analyses: the PRISMA statement. *Ann Intern Med*. 2009;151.
21. Moher D, Liberati A, Tetzlaff J, Altman DG, Group P. Reprint—preferred reporting items for systematic reviews and meta-analyses: the PRISMA statement. *Physical therapy*. 2009;89(9):873-80.
22. Beller E, Glasziou P, Altman D, Hopewell S, Bastian H, Chalmers I, et al. PRISMA for abstracts: reporting systematic reviews in journal and conference abstracts. *PLoS Med*. 2013;10(4).
23. Moher D, Liberati A, Tetzlaff J, Altman D. Preferred reporting items for systematic reviews and meta-analyses: the PRISMA statement. *PLoS Med*. 2009;6(7).
24. Joanna Briggs institute Reviewers' manual 2014 edition. Adelaide: Adelaide University; 2014.
25. Joanna Briggs institute reviewers' manual 2008.
26. Higgins J, Hompson S. Quantifying heterogeneity in a meta-analysis 2002.

**PRISMA-P (Preferred Reporting Items for Systematic review and Meta-Analysis Protocols) 2015 checklist: recommended items to address in a systematic review protocol\***

| Section and topic                 | Item No | Checklist item                                                                                                                                                                                                                | (Page No.#) |
|-----------------------------------|---------|-------------------------------------------------------------------------------------------------------------------------------------------------------------------------------------------------------------------------------|-------------|
| <b>ADMINISTRATIVE INFORMATION</b> |         |                                                                                                                                                                                                                               |             |
| Title:                            |         |                                                                                                                                                                                                                               |             |
| Identification                    | 1a      | Identify the report as a protocol of a systematic review                                                                                                                                                                      | 1           |
| Update                            | 1b      | If the protocol is for an update of a previous systematic review, identify as such                                                                                                                                            | NA          |
| Registration                      | 2       | If registered, provide the name of the registry (such as PROSPERO) and registration number                                                                                                                                    | 2, 6        |
| Authors:                          |         |                                                                                                                                                                                                                               |             |
| Contact                           | 3a      | Provide name, institutional affiliation, e-mail address of all protocol authors; provide physical mailing address of corresponding author                                                                                     | 1           |
| Contributions                     | 3b      | Describe contributions of protocol authors and identify the guarantor of the review                                                                                                                                           | 12          |
| Amendments                        | 4       | If the protocol represents an amendment of a previously completed or published protocol, identify as such and list changes; otherwise, state plan for documenting important protocol amendments                               | NA          |
| Support:                          |         |                                                                                                                                                                                                                               |             |
| Sources                           | 5a      | Indicate sources of financial or other support for the review                                                                                                                                                                 | 12          |
| Sponsor                           | 5b      | Provide name for the review funder and/or sponsor                                                                                                                                                                             | NA          |
| Role of sponsor or funder         | 5c      | Describe roles of funder(s), sponsor(s), and/or institution(s), if any, in developing the protocol                                                                                                                            | NA          |
| <b>INTRODUCTION</b>               |         |                                                                                                                                                                                                                               |             |
| Rationale                         | 6       | Describe the rationale for the review in the context of what is already known                                                                                                                                                 | 4-5         |
| Objectives                        | 7       | Provide an explicit statement of the question(s) the review will address with reference to participants, interventions, comparators, and outcomes (PICO)                                                                      | 6           |
| <b>METHODS</b>                    |         |                                                                                                                                                                                                                               |             |
| Eligibility criteria              | 8       | Specify the study characteristics (such as PICO, study design, setting, time frame) and report characteristics (such as years considered, language, publication status) to be used as criteria for eligibility for the review | 6           |
| Information sources               | 9       | Describe all intended information sources (such as electronic databases, contact with study authors, trial registers or other grey literature sources) with planned dates of coverage                                         | 7           |
| Search strategy                   | 10      | Present draft of search strategy to be used for at least one electronic database, including planned limits, such that it could be repeated                                                                                    | 7           |

|                                    |     |                                                                                                                                                                                                                                                     |      |
|------------------------------------|-----|-----------------------------------------------------------------------------------------------------------------------------------------------------------------------------------------------------------------------------------------------------|------|
| Study records:                     |     |                                                                                                                                                                                                                                                     |      |
| Data management                    | 11a | Describe the mechanism(s) that will be used to manage records and data throughout the review                                                                                                                                                        | 6-10 |
| Selection process                  | 11b | State the process that will be used for selecting studies (such as two independent reviewers) through each phase of the review (that is, screening, eligibility and inclusion in meta-analysis)                                                     | 6-9  |
| Data collection process            | 11c | Describe planned method of extracting data from reports (such as piloting forms, done independently, in duplicate), any processes for obtaining and confirming data from investigators                                                              | 9    |
| Data items                         | 12  | List and define all variables for which data will be sought (such as PICO items, funding sources), any pre-planned data assumptions and simplifications                                                                                             | 9    |
| Outcomes and prioritization        | 13  | List and define all outcomes for which data will be sought, including prioritization of main and additional outcomes, with rationale                                                                                                                | 9    |
| Risk of bias in individual studies | 14  | Describe anticipated methods for assessing risk of bias of individual studies, including whether this will be done at the outcome or study level, or both; state how this information will be used in data synthesis                                | 8-9  |
| Data synthesis                     | 15a | Describe criteria under which study data will be quantitatively synthesised                                                                                                                                                                         | 10   |
|                                    | 15b | If data are appropriate for quantitative synthesis, describe planned summary measures, methods of handling data and methods of combining data from studies, including any planned exploration of consistency (such as I <sup>2</sup> , Kendall's τ) | 10   |
|                                    | 15c | Describe any proposed additional analyses (such as sensitivity or subgroup analyses, meta-regression)                                                                                                                                               | 10   |
|                                    | 15d | If quantitative synthesis is not appropriate, describe the type of summary planned                                                                                                                                                                  | 10   |
| Meta-bias(es)                      | 16  | Specify any planned assessment of meta-bias(es) (such as publication bias across studies, selective reporting within studies)                                                                                                                       | 10   |
| Confidence in cumulative evidence  | 17  | Describe how the strength of the body of evidence will be assessed (such as GRADE)                                                                                                                                                                  | 10   |

**\* It is strongly recommended that this checklist be read in conjunction with the PRISMA-P Explanation and Elaboration (cite when available) for important clarification on the items. Amendments to a review protocol should be tracked and dated. The copyright for PRISMA-P (including checklist) is held by the PRISMA-P Group and is distributed under a Creative Commons Attribution Licence 4.0.**

*From: Shamseer L, Moher D, Clarke M, Ghersi D, Liberati A, Petticrew M, Shekelle P, Stewart L, PRISMA-P Group. Preferred reporting items for systematic review and meta-analysis protocols (PRISMA-P) 2015: elaboration and explanation. BMJ. 2015 Jan 2;349(jan02 1):g7647.*

# BMJ Open

## The prevalence and associated factors of preterm birth in Ethiopia: Systematic review and meta-analysis protocol

|                                 |                                                                                                                                                                                                                                                                                                                                                                                                                                                                                                                                                                                                                                                               |
|---------------------------------|---------------------------------------------------------------------------------------------------------------------------------------------------------------------------------------------------------------------------------------------------------------------------------------------------------------------------------------------------------------------------------------------------------------------------------------------------------------------------------------------------------------------------------------------------------------------------------------------------------------------------------------------------------------|
| Journal:                        | <i>BMJ Open</i>                                                                                                                                                                                                                                                                                                                                                                                                                                                                                                                                                                                                                                               |
| Manuscript ID                   | bmjopen-2019-035574.R1                                                                                                                                                                                                                                                                                                                                                                                                                                                                                                                                                                                                                                        |
| Article Type:                   | Protocol                                                                                                                                                                                                                                                                                                                                                                                                                                                                                                                                                                                                                                                      |
| Date Submitted by the Author:   | 20-Feb-2020                                                                                                                                                                                                                                                                                                                                                                                                                                                                                                                                                                                                                                                   |
| Complete List of Authors:       | Muchie, Kindie Fentahun; Bahir Dar University, Epidemiology and Biostatistics<br>Molla, Ayenew; University of Gondar College of Medicine and Health Sciences, Epidemiology and Biostatistics;<br>Teshome, Destaw; University of Gondar College of Medicine and Health Sciences, Epidemiology and Biostatistics<br>Yenit, Melaku; University of Gondar, Epidemiology and Biostatistics<br>Sisay, Malede; University of Gondar College of Medicine and Health Sciences, Epidemiology and Biostatistics<br>Mekonnen, Fantahun Ayenew ; University of Gondar, Epidemiology and Biostatistics<br>Habitu, Yohanes Ayanaw; University of Gondar, Reproductive Health |
| <b>Primary Subject Heading</b>: | Epidemiology                                                                                                                                                                                                                                                                                                                                                                                                                                                                                                                                                                                                                                                  |
| Secondary Subject Heading:      | Public health, Global health, Epidemiology                                                                                                                                                                                                                                                                                                                                                                                                                                                                                                                                                                                                                    |
| Keywords:                       | EPIDEMIOLOGY, PUBLIC HEALTH, STATISTICS & RESEARCH METHODS                                                                                                                                                                                                                                                                                                                                                                                                                                                                                                                                                                                                    |
|                                 |                                                                                                                                                                                                                                                                                                                                                                                                                                                                                                                                                                                                                                                               |

SCHOLARONE™  
Manuscripts



I, the Submitting Author has the right to grant and does grant on behalf of all authors of the Work (as defined in the below author licence), an exclusive licence and/or a non-exclusive licence for contributions from authors who are: i) UK Crown employees; ii) where BMJ has agreed a CC-BY licence shall apply, and/or iii) in accordance with the terms applicable for US Federal Government officers or employees acting as part of their official duties; on a worldwide, perpetual, irrevocable, royalty-free basis to BMJ Publishing Group Ltd ("BMJ") its licensees and where the relevant Journal is co-owned by BMJ to the co-owners of the Journal, to publish the Work in this journal and any other BMJ products and to exploit all rights, as set out in our [licence](#).

The Submitting Author accepts and understands that any supply made under these terms is made by BMJ to the Submitting Author unless you are acting as an employee on behalf of your employer or a postgraduate student of an affiliated institution which is paying any applicable article publishing charge ("APC") for Open Access articles. Where the Submitting Author wishes to make the Work available on an Open Access basis (and intends to pay the relevant APC), the terms of reuse of such Open Access shall be governed by a Creative Commons licence – details of these licences and which [Creative Commons](#) licence will apply to this Work are set out in our licence referred to above.

Other than as permitted in any relevant BMJ Author's Self Archiving Policies, I confirm this Work has not been accepted for publication elsewhere, is not being considered for publication elsewhere and does not duplicate material already published. I confirm all authors consent to publication of this Work and authorise the granting of this licence.

1  
2  
3 1 **The prevalence and associated factors of preterm birth in Ethiopia: Systematic**  
4 **review and meta-analysis protocol**

5  
6 3 Kindie Fentahun Muchie<sup>1\*</sup>, Ayenew Molla Lakew<sup>2</sup>, Destaw Fetene Teshome<sup>2</sup>, Melaku  
7  
8 4 Kindie Yenit<sup>2</sup>, Malede Mequanent Sisay<sup>2</sup>, Fantahun Ayenew Mekonnen<sup>2</sup>, Yohanes  
9  
10 5 Ayanaw Habitu<sup>3</sup>  
11  
12 6

13  
14 7 <sup>1</sup>Department of Epidemiology and Biostatistics, School of Public Health, College of Medicine and  
15  
16 8 Health Sciences, Bahir Dar University, Bahir Dar, Ethiopia

17  
18 9 <sup>2</sup>Department of Epidemiology and Biostatistics, Institute of Public Health, College of Medicine and  
19  
20 10 Health Sciences, University of Gondar, Gondar, Ethiopia

21  
22 11 <sup>3</sup>Department of Reproductive Health, Institute of Public Health, College of Medicine and Health  
23  
24 12 Sciences, University of Gondar, Gondar, Ethiopia  
25

26  
27 14 **E-mail addresses:**

28  
29 15 KFM ([mkindief@gmail.com](mailto:mkindief@gmail.com)), AML ([mayenew15@gmail.com](mailto:mayenew15@gmail.com)), DFT  
30  
31 16 ([destaw.fetene@gmail.com](mailto:destaw.fetene@gmail.com)), MKY ([melaku98@gmail.com](mailto:melaku98@gmail.com)), MMS  
32  
33 17 ([maledecsa@gmail.com](mailto:maledecsa@gmail.com)), FAM ([fantahun.ayenew@yahoo.com](mailto:fantahun.ayenew@yahoo.com)), YAH  
34  
35 18 ([ayanawyohanes@yahoo.com](mailto:ayanawyohanes@yahoo.com))  
36  
37 19

38  
39  
40  
41  
42  
43  
44  
45  
46  
47  
48  
49  
50  
51  
52  
53  
54  
55  
56  
57  
58  
59  
60  
61  
62  
63  
64  
65  
66  
67  
68  
69  
70  
71  
72  
73  
74  
75  
76  
77  
78  
79  
80  
81  
82  
83  
84  
85  
86  
87  
88  
89  
90  
91  
92  
93  
94  
95  
96  
97  
98  
99  
100  
101  
102  
103  
104  
105  
106  
107  
108  
109  
110  
111  
112  
113  
114  
115  
116  
117  
118  
119  
120  
121  
122  
123  
124  
125  
126  
127  
128  
129  
130  
131  
132  
133  
134  
135  
136  
137  
138  
139  
140  
141  
142  
143  
144  
145  
146  
147  
148  
149  
150  
151  
152  
153  
154  
155  
156  
157  
158  
159  
160  
161  
162  
163  
164  
165  
166  
167  
168  
169  
170  
171  
172  
173  
174  
175  
176  
177  
178  
179  
180  
181  
182  
183  
184  
185  
186  
187  
188  
189  
190  
191  
192  
193  
194  
195  
196  
197  
198  
199  
200  
201  
202  
203  
204  
205  
206  
207  
208  
209  
210  
211  
212  
213  
214  
215  
216  
217  
218  
219  
220  
221  
222  
223  
224  
225  
226  
227  
228  
229  
230  
231  
232  
233  
234  
235  
236  
237  
238  
239  
240  
241  
242  
243  
244  
245  
246  
247  
248  
249  
250  
251  
252  
253  
254  
255  
256  
257  
258  
259  
260  
261  
262  
263  
264  
265  
266  
267  
268  
269  
270  
271  
272  
273  
274  
275  
276  
277  
278  
279  
280  
281  
282  
283  
284  
285  
286  
287  
288  
289  
290  
291  
292  
293  
294  
295  
296  
297  
298  
299  
300  
301  
302  
303  
304  
305  
306  
307  
308  
309  
310  
311  
312  
313  
314  
315  
316  
317  
318  
319  
320  
321  
322  
323  
324  
325  
326  
327  
328  
329  
330  
331  
332  
333  
334  
335  
336  
337  
338  
339  
340  
341  
342  
343  
344  
345  
346  
347  
348  
349  
350  
351  
352  
353  
354  
355  
356  
357  
358  
359  
360  
361  
362  
363  
364  
365  
366  
367  
368  
369  
370  
371  
372  
373  
374  
375  
376  
377  
378  
379  
380  
381  
382  
383  
384  
385  
386  
387  
388  
389  
390  
391  
392  
393  
394  
395  
396  
397  
398  
399  
400  
401  
402  
403  
404  
405  
406  
407  
408  
409  
410  
411  
412  
413  
414  
415  
416  
417  
418  
419  
420  
421  
422  
423  
424  
425  
426  
427  
428  
429  
430  
431  
432  
433  
434  
435  
436  
437  
438  
439  
440  
441  
442  
443  
444  
445  
446  
447  
448  
449  
450  
451  
452  
453  
454  
455  
456  
457  
458  
459  
460  
461  
462  
463  
464  
465  
466  
467  
468  
469  
470  
471  
472  
473  
474  
475  
476  
477  
478  
479  
480  
481  
482  
483  
484  
485  
486  
487  
488  
489  
490  
491  
492  
493  
494  
495  
496  
497  
498  
499  
500  
501  
502  
503  
504  
505  
506  
507  
508  
509  
510  
511  
512  
513  
514  
515  
516  
517  
518  
519  
520  
521  
522  
523  
524  
525  
526  
527  
528  
529  
530  
531  
532  
533  
534  
535  
536  
537  
538  
539  
540  
541  
542  
543  
544  
545  
546  
547  
548  
549  
550  
551  
552  
553  
554  
555  
556  
557  
558  
559  
560  
561  
562  
563  
564  
565  
566  
567  
568  
569  
570  
571  
572  
573  
574  
575  
576  
577  
578  
579  
580  
581  
582  
583  
584  
585  
586  
587  
588  
589  
590  
591  
592  
593  
594  
595  
596  
597  
598  
599  
600  
601  
602  
603  
604  
605  
606  
607  
608  
609  
610  
611  
612  
613  
614  
615  
616  
617  
618  
619  
620  
621  
622  
623  
624  
625  
626  
627  
628  
629  
630  
631  
632  
633  
634  
635  
636  
637  
638  
639  
640  
641  
642  
643  
644  
645  
646  
647  
648  
649  
650  
651  
652  
653  
654  
655  
656  
657  
658  
659  
660  
661  
662  
663  
664  
665  
666  
667  
668  
669  
670  
671  
672  
673  
674  
675  
676  
677  
678  
679  
680  
681  
682  
683  
684  
685  
686  
687  
688  
689  
690  
691  
692  
693  
694  
695  
696  
697  
698  
699  
700  
701  
702  
703  
704  
705  
706  
707  
708  
709  
710  
711  
712  
713  
714  
715  
716  
717  
718  
719  
720  
721  
722  
723  
724  
725  
726  
727  
728  
729  
730  
731  
732  
733  
734  
735  
736  
737  
738  
739  
740  
741  
742  
743  
744  
745  
746  
747  
748  
749  
750  
751  
752  
753  
754  
755  
756  
757  
758  
759  
760  
761  
762  
763  
764  
765  
766  
767  
768  
769  
770  
771  
772  
773  
774  
775  
776  
777  
778  
779  
780  
781  
782  
783  
784  
785  
786  
787  
788  
789  
790  
791  
792  
793  
794  
795  
796  
797  
798  
799  
800  
801  
802  
803  
804  
805  
806  
807  
808  
809  
810  
811  
812  
813  
814  
815  
816  
817  
818  
819  
820  
821  
822  
823  
824  
825  
826  
827  
828  
829  
830  
831  
832  
833  
834  
835  
836  
837  
838  
839  
840  
841  
842  
843  
844  
845  
846  
847  
848  
849  
850  
851  
852  
853  
854  
855  
856  
857  
858  
859  
860  
861  
862  
863  
864  
865  
866  
867  
868  
869  
870  
871  
872  
873  
874  
875  
876  
877  
878  
879  
880  
881  
882  
883  
884  
885  
886  
887  
888  
889  
890  
891  
892  
893  
894  
895  
896  
897  
898  
899  
900  
901  
902  
903  
904  
905  
906  
907  
908  
909  
910  
911  
912  
913  
914  
915  
916  
917  
918  
919  
920  
921  
922  
923  
924  
925  
926  
927  
928  
929  
930  
931  
932  
933  
934  
935  
936  
937  
938  
939  
940  
941  
942  
943  
944  
945  
946  
947  
948  
949  
950  
951  
952  
953  
954  
955  
956  
957  
958  
959  
960  
961  
962  
963  
964  
965  
966  
967  
968  
969  
970  
971  
972  
973  
974  
975  
976  
977  
978  
979  
980  
981  
982  
983  
984  
985  
986  
987  
988  
989  
990  
991  
992  
993  
994  
995  
996  
997  
998  
999  
1000

19 **\*Correspondence**

## 1           2           3           4           5           6           7           8           9           10           11           12           13           14           15           16           17           18           19           20           21           22           23           24           25           26           27           28           29           30           31           32           33           34           35           36           37           38           39           40           41           42           43           44           45           46           47           48           49           50           51           52           53           54           55           56           57           58           59           60

# 1   **ABSTRACT**

2   **Introduction:** Preterm birth complications are the leading cause of death among  
3 neonates globally. The reduction in neonatal mortality is not remarkable in Ethiopia.  
4 Therefore, this review is aimed at assessing the magnitude and associated factors of  
5 preterm birth in Ethiopia.

6   **Methods and Analysis:** The preferred reporting items for systematic reviews and meta-  
7 analyses guideline will be followed during the systematic review. We will include all  
8 observational studies published from Jan 01, 2009 to Dec 31, 2019 that examined the  
9 level and/or associated factors of preterm birth in Ethiopia. Electronic databases such as  
10 PubMed, and Science Direct as well as Google search engine and Google Scholar will  
11 be searched. The pooled prevalence of preterm and effect size of association for  
12 associated factors will be analyzed using the Stata software version 14. The  
13 heterogeneity between studies will be measured by  $I^2$  statistics. A random-effects model  
14 will be used to estimate if heterogeneity detected among studies. Publication bias will be  
15 assessed using a funnel plot. Forest plots will be used to present the combined estimate  
16 with 95% confidence intervals. The quality of evidence of the outcomes will be assessed  
17 with the GRADE approach.

18   **Ethics and dissemination:** No ethical approval is necessary for this systematic review.  
19 The findings will be published in a peer-reviewed journal.

20   **PROSPERO registration number:** CRD42017077356.

21   **Keywords:** Preterm birth, Prevalence, Associated Factors, Ethiopia, Systematic review,  
22 Meta-analysis

## 1 STRENGTHS AND LIMITATIONS OF THIS STUDY

- 2 ➤ The proposed study will provide updated knowledge on the prevalence of preterm  
3 birth, leading cause of neonatal death, in Ethiopia where reduction in neonatal  
4 mortality is no remarkable.
- 5 ➤ The proposed study will provide a comprehensive knowledge on the associated  
6 factors of preterm birth in Ethiopia.
- 7 ➤ The PRISMA guideline will be followed during the proposed systematic review.
- 8 ➤ Standard tool for critical appraisal and data extraction will be used
- 9 ➤ Only quantitative observational studies published in English will be included.



## 1 INTRODUCTION

2 Preterm birth is a birth before 37 completed weeks of gestation (1). It is more prevalent  
3 in Africa and Asia. Preterm birth complications remained the leading cause of under-5  
4 and neonatal mortalities. Preterm birth, the majority being spontaneously, occurs for a  
5 variety of reasons(2). Currently, World Health Organization (WHO) is committed to reduce  
6 the health problems and lives lost as a result of preterm births.

7 Globally, 14.9 million babies born preterm making a birth rate of 11.1%, ranging from 5%  
8 to 18%, in 2010 (3). The majority (60%) of these births occurred in sub-Saharan Africa  
9 and South Asia where 52% of global livebirths occur. The estimated global preterm birth  
10 rate was also 10.6%, 14.84 million live preterm births, in 2014 (4). Twelve million (81.1%)  
11 of these preterm births occurred in Asia and sub-Saharan Africa (4) showing the  
12 contribution is raised from 2010. Ethiopia is one of the low-middle incomes countries in  
13 Sub-Saharan Africa.

14 Preterm birth remains a crucial issue in child mortality and improving quality of maternal  
15 and newborn care(4). Complications of preterm birth is the leading cause of death among  
16 under 5 children with risk of dying ranged between 1.9 and 155.1 per 1,000 livebirths , in  
17 2015 (5). In the same report, it had been found as the leading cause of death among  
18 neonates contributing for 0.944 million deaths. Complication of infants born preterm  
19 result in significant cost to the health sector, parents and the society in that preterm  
20 neonates take the first place for neonatal intensive care unit (NICU) admission and longer  
21 hospital stay globally (4).

22 Currently, WHO is committed to reduce the health problems and lives lost as a result of  
23 preterm births (6). Hence, WHO had developed new guidelines including interventions

1 provided to the mother and the newborn baby (6). The Every Woman Every  
2 Child movement is also aiming to intensify national and international commitment and  
3 action to ensure that women, children and adolescents are at the heart of development.  
4 The movement puts into action the global strategy (2016-2030) (7). The strategy is aimed  
5 to end all preventable deaths of women, children and adolescents within a generation  
6 and ensuring their well-being. Though Ethiopia achieved the millennium development  
7 goal 4 with 67% under-five mortality reduction from the 1990 estimate, the reduction in  
8 neonatal mortality is not remarkable (8). However, Ethiopia has planned to reduce  
9 neonatal mortality rate from 28 in 2015/16 to 10 by 2019/2020 (9). Furthermore, the  
10 country is also devoted to end preventable deaths of newborns and children under 5 years  
11 of age by 2030 (10).

12 There are local studies on preterm births conducted in Ethiopia. The need for an accurate  
13 and reliable result (11, 12), a single study aggregating these studies is necessary for  
14 policy makers and implementers. Even though, there is a systematic review (13) done, it  
15 addressed only the effect of pregnancy induced hypertension and multiple pregnancies  
16 on preterm birth. However, literatures show that more factors affect preterm birth. Among  
17 some of the identified associated factors of preterm birth in Ethiopia are obstetric  
18 complication during the current pregnancy (14) specifically including pregnancy induced  
19 hypertension (15, 16), premature rupture of membrane (17, 18) and hypertension during  
20 pregnancy (17); history of obstetric complications including history of abortion (17), history  
21 of still birth (17), history of low birth weight (17) and history of preterm birth (17); chronic  
22 illness (15, 18), nutritional status (14), anemia (18), antenatal care follow up (14, 16, 18),  
23 substance intake during pregnancy (17), multiple gestation (16, 17), and income status

1  
2  
3 1 (18). Hence, conducting a systematic review and meta-analysis on preterm birth is  
4  
5 2 paramount important in Ethiopia by updating the latest possible evidences.  
6  
7  
8 3 Therefore this review is aimed at assessing the magnitude and associated factors of  
9  
10 4 preterm birth (births before 37 gestational weeks) in Ethiopia.

## 11 5 **METHODS AND ANALYSIS**

### 12 6 **Development of the review method**

13  
14  
15 7 The methods of this systematic review and meta-analysis protocol was developed based  
16  
17 8 on the PRISMA Protocols (PRISMA-P) 2015 statement (19). The preferred reporting  
18  
19 9 items for systematic reviews and meta-analyses (PRISMA) guideline will be followed  
20  
21 10 during the systematic review(20, 21). The result of the review will be reported according  
22  
23 11 to the PRISMA guideline for reporting (22). The four phases that were drawn from the  
24  
25 12 PRISMA flow chart (23) will be documented in the results to show the study selection  
26  
27 13 process from initially identified records to finally included studies. The protocol for this  
28  
29 14 systematic review and meta-analysis is registered in international prospective register of  
30  
31 15 systematic reviews (PROSPERO) and obtained the registration number  
32  
33 16 (CRD42017064585). The initial anticipated or actual start date as well as anticipated  
34  
35 17 completion date were updated with brief details on PROSPERO records. We would like  
36  
37 18 to disclose that the update was not related to any problem to the present study.

### 38 19 **Eligibility criteria**

39  
40  
41 20 We will include all observational studies that examined the level and/or associated factors  
42  
43 21 of preterm birth (births before 37 weeks of gestational period) in Ethiopia. Reviews,  
44  
45 22 editorials, case series and case reports on preterm birth as well as studies that only  
46  
47 23 reported qualitative findings on preterm birth will be excluded. In studies that reported  
48  
49  
50  
51  
52  
53  
54  
55  
56  
57  
58  
59  
60

1 both quantitative and qualitative results, we will only consider the quantitative findings.  
2 Studies will be considered relevant if they assessed the magnitude of preterm birth and/or  
3 examined the associated factors of preterm birth. Regarding magnitude, only those  
4 studies that reported percentages out of livebirths will be eligible.

### 5 **Search strategy**

6 Major medical electronic databases such as PubMed, and Science Direct will be searched  
7 to identify relevant literature for the review. To cover grey literature, we will hand-search  
8 literature using the Google search engine and Google Scholar and references of  
9 electronically identified articles. Further, references list will also be considered from  
10 relevant studies considered for critical appraisal.

11 The literature search will be carried out by the primary author (KFM). The search will be  
12 limited to humans, and journal studies published in English from Jan 01, 2009 to Dec 31,  
13 2019. We will apply Medical Subject Headings (MeSH) terms from PubMed, and  
14 combined key words to identify studies in the databases.

15 Accordingly, literatures will be retrieved using the exact search phrase (*"Premature  
16 Birth/epidemiology"[Mesh] OR "Premature Birth/etiology"[Mesh] OR "Premature  
17 Birth/statistics and numerical data"[Mesh] OR premature birth\* [MeSH] OR preterm birth  
18 OR premature birth OR preterm labo\* OR preterm deliver\* OR preterm infant OR preterm  
19 neonate\* OR preterm newborn\* OR birth outcome OR pregnancy outcome\$ OR  
20 pregnancy complication\$ OR birth outcome\$ OR birth complication\$) AND Ethiopia AND  
21 ((incidence OR prevalence OR magnitude OR burden) OR (predict\* OR associated  
22 factor\* OR risk factor\* OR determinant\*)) from PubMed. This will be customized for other  
23 databases.*

## 1 **Study selection process**

2 The retrieved studies will be exported to the citation manager (EndNote) and then  
3 duplicates excluded. The titles and abstracts of the studies will be reviewed for screening  
4 by two authors (KFM and AML) for obvious exclusion according to the eligibility/inclusion  
5 criteria. Based on this screening, the titles and abstracts of the studies will be classified  
6 as included, excluded, and undecided. Full text of all the included and the undecided  
7 studies will be searched for further eligibility assessment.

8 The full texts of the included and undecided categories of the studies will be independently  
9 reviewed by two authors (KFM and AML) against the eligibility criteria for final inclusion.

10 Studies that are not eligible based on the examination of the full-text will be excluded by  
11 stating the reasons according to the inclusion criteria. Disagreements between the two  
12 reviewers will be resolved through discussion and consensus.

13 Studies deemed to be appropriate will be scanned in full to determine relevance.

14 Secondly, the references lists of all relevant studies will be reviewed to find additional  
15 studies that may have been difficult to detect in the database search due to non-reporting  
16 in the abstract (possibly due to non-significant effects). Studies published by the same  
17 team will be carefully reviewed to ensure the results of a given study are not included  
18 twice in this review.

## 19 **Critical appraisal**

20 All of the included studies will be critically appraised for their validity. The three authors  
21 (DFT, MKY, FA) will check the methodological robustness and validity of the findings  
22 using the Joanna Briggs Institute (JBI) Meta-Analysis of Statistics Assessment and  
23 Review Instrument (24). Uncertainties will be resolved by joint discussion between the

1 reviewers. Disagreements among the reviewers will be resolved through discussion and  
2 consensus.

3 The JBI Meta-Analysis of Statistics Assessment and Review Instrument (JBI-MAStARI)  
4 will be used for critical appraisal (25). This tool contains a separate appraisal checklist for  
5 each type of the study design. The reviewers will independently assess articles prior to  
6 inclusion in the final review using this instrument. Any disagreement among the reviewers  
7 will be resolved through discussion, and by involving another reviewer. A Study with  
8 quality assessment score of 50% and above and a study having a response rate of 80%  
9 and above were included in the final review.

#### 10 **Data extraction**

11 The JBI data extraction form will be used to extract the characteristics of the studies and  
12 prevalence of preterm birth (primary outcome) as well as Odds ratio (secondary  
13 outcomes). A standardized excel sheet will be created and information from the  
14 standardized review forms will be transferred in order to be readily available for the  
15 systematic review. Three reviewers (KFM, MMS and AML) will extract data  
16 independently. Disagreements among the reviewers were resolved through discussion  
17 and consensus.

18 This tool will include information on the author, year of publication, objective, study  
19 setting, year of survey, study design, sample size, data collection method, study  
20 participants, definition used for preterm birth, prevalence of preterm, 95% CI for  
21 prevalence of preterm birth, and list of associated factors with their effect size. A  
22 quantitative data of cross-tabulation between the subject's characteristics (associated  
23 factors) and the preterm birth will also systematically abstracted.

## 1 **Data synthesis and statistical analysis**

2 The individual studies will be concisely described using a summary table. The summary  
3 table particularly describes the characteristics of the included studies and the main  
4 findings.

5 The data will be analyzed by the Stata software version 14. For studies which did not  
6 present a standard error (SE), it will be calculated using the formula;  $SE = \sqrt{(p \times (1-p)/n)}$ .

7 The calculated standard error and prevalence rate of each study will then entered into

8 Stata software to calculate the overall prevalence and its 95% confidence interval (CI).

9 Similarly, the relationship between factors and preterm birth will be summarized using

10 statistical estimates of effect sizes, odds ratio. Subgroup analysis will be sought based

11 on possible characteristics of the studies.

12 The level of heterogeneity among the studies will be quantified using the  $I^2$  statistics (26).

13 Meta-analysis using random effects model will be conducted for the  $I^2$  value of more than

14 75%, considered as heterogeneity. Publication bias will be assessed using a funnel plot

15 and Egger's test of small study bias. Symmetric funnel plot as well as insignificant Egger's

16 test will be taken as evidence for no serious small study bias (publication bias). Trim and

17 fill technique will be considered for substantial publication bias. Further, sensitivity

18 analysis will be used to assess the influential studies on the pooled estimate.

19 Forest plots will be used to present the combined estimate with 95% CI. The quality of evidence

20 of the outcomes will be assessed with the GRADE approach. If no more than one study

21 will be found for each of the objective, then the finding will be synthesized narratively.

## 22 **Potential limitations**

1  
2  
3 1 Only quantitative observational studies published in English will be included. This might  
4  
5 2 exclude studies those published in other languages. Further, qualitative studies that  
6  
7 3 assessed the associated factors might be excluded. Therefore, the readers are advised  
8  
9 4 to take this into account.  
10  
11  
12

### 13 **Patient and public involvement**

14  
15 6 It was not appropriate to involve patients or the public in the design, or conduct, or  
16  
17 7 reporting, or dissemination plans of our research as no individual information will be  
18  
19 8 discussed.  
20  
21

### 22 **Ethics and dissemination**

23  
24 10 The review will be based on published data, and thus there is no requirement for ethical  
25  
26 11 approval. The results will be disseminated through publication in a peer reviewed journal,  
27  
28 12 and through presentations at academic conferences.  
29  
30

## 31 **DISCUSSION**

32  
33 14 It is crucial to know the importance of preterm birth and contributing factors considering  
34  
35 15 the latest statistics in a country. Hence, this review will present on the country wide  
36  
37 16 magnitude of preterm birth and the associated factors of preterm birth. The result will  
38  
39 17 provide information to guide health professionals and health policy makers for monitoring  
40  
41 18 preterm birth strategy and applying necessary preventive and appropriate measures to  
42  
43 19 decrease preterm birth.  
44  
45  
46

### 47 **Abbreviations**

48  
49 21 ACTION: Antenatal Corticosteroids for Improving Outcomes in preterm Newborns  
50

51  
52 22 CI: Confidence Interval  
53

54  
55 23 JBI: Joanna Briggs Institute  
56  
57  
58  
59  
60



1  
2  
3 1 JBI-MAStARI: JBI Meta-Analysis of Statistics Assessment and Review Instrument

4  
5 2 KMC: Kangaroo Mother Care

6  
7 3 LMICs: Low and Middle Income Countries

8  
9 4 MeSH: Medical Subject Headings

10  
11 5 NICU: Neonatal Intensive Care Unit

12  
13 6 NMR: Neonatal Mortality Rate

14  
15 7 PRISMA: Preferred Reporting Items for Systematic Reviews and Meta-analyses

16  
17 8 PRISMA-P: Preferred Reporting Items for Systematic Reviews and Meta-analyses

18  
19 9 Protocol

20  
21 10 PROSPERO: Prospective Register of Systematic Reviews

22  
23 11 SE: Standard Error

24  
25 12 WHO: World Health Organization

26  
27 13 **Declarations**

28  
29 14 ***Consent for publication***

30  
31 15 Not applicable.

32  
33 16 ***Availability of data and materials***

34  
35 17 Not applicable.

36  
37 18 ***Competing interests***

38  
39 19 The authors declare that they have no competing interests

40  
41 20 ***Funding***

42  
43 21 None.

## 1 **Author contributions**

2 KFM, MKY, YAH contributed to the conception of the research protocol. KFM, AML, DFT,  
3 MMS, FAM designed the study. KFM, DFT, AML reviewed the literature, and wrote the  
4 protocol. KFM, AML, DFT, MKY, FAM, MMS, and YAH reviewed and rewrote the protocol.  
5 All authors read and approved the final manuscript.

## 6 **References**

- 7 1. Who: Recommended Definitions, Terminology and Format for Statistical Tables Related  
8 to The Perinatal Period And Use of A New Certificate For Cause of Perinatal Deaths. *Acta*  
9 *Obstetrica et Gynecologica Scandinavica*. 1977;56(3):247-53.
- 10 2. March of Dimes, PMNCH, Save the Children, WHO. Born Too Soon: The Global action  
11 report on preterm Birth. In: Eds CP Howson, MV Kinney, JE Lawn, editors. Geneva: World  
12 Health Organization; 2012.
- 13 3. Blencowe H, Cousens S, Oestergaard MZ, Chou D, Moller A-B, Narwal R, et al.  
14 National, regional, and worldwide estimates of preterm birth rates in the year 2010 with time  
15 trends since 1990 for selected countries: a systematic analysis and implications. *The Lancet*.  
16 2012;379(9832):2162-72.
- 17 4. Chawanpaiboon S, Vogel JP, Moller A-B, Lumbiganon P, Petzold M, Hogan D, et al.  
18 Global, regional, and national estimates of levels of preterm birth in 2014: a systematic review  
19 and modelling analysis. *The Lancet Global Health*. 2019;7(1):e37-e46.
- 20 5. Liu L, Oza S, Hogan D, Chu Y, Perin J, Zhu J, et al. Global, regional, and national  
21 causes of under-5 mortality in 2000-15: an updated systematic analysis with implications for the  
22 Sustainable Development Goals. *The Lancet*. 2016;388(10063):3027-35.
- 23 6. WHO. WHO Fact sheets on Preterm birth In: WHO, editor. 2018.
- 24 7. Every Woman Every Child. The global strategy for women's, children's, and adolescents'  
25 health (2016-2030): Survive, thrive, transform. In: Every Woman Every Child, editor. 2015.
- 26 8. Ruducha J, Mann C, Singh NS, Gemebo TD, Tessema NS, Baschieri A, et al. How  
27 Ethiopia achieved Millennium Development Goal 4 through multisectoral interventions: a  
28 Countdown to 2015 case study. *The Lancet Global Health*. 2017;5(11):e1142-e51.
- 29 9. The Federal Democratic Republic of Ethiopia Ministry of Health. Health Sector  
30 Transformation Plan. 2015.
- 31 10. United Nations. Sustainable Development Goals. Secretary-General. 2015.
- 32 11. Cohn LD, Becker BJ. How meta-analysis increases statistical power. *Psychological*  
33 *Methods*. 2003;8(3):243-53.
- 34 12. Noble JH, Jr. Meta-analysis: Methods, strengths, weaknesses, and political uses. *The*  
35 *Journal of Laboratory and Clinical Medicine*. 2006;147(1):7-20.
- 36 13. Mulualem G, Wondim A, Woretaw A. The effect of pregnancy induced hypertension and  
37 multiple pregnancies on preterm birth in Ethiopia: a systematic review and meta-analysis. *BMC*  
38 *Research Notes*. 2019;12(1):91.
- 39 14. Mekonen DG, Yismaw AE, Nigussie TS, Ambaw WM. Proportion of Preterm birth and  
40 associated factors among mothers who gave birth in Debretabor town health institutions,  
41 northwest, Ethiopia. *BMC Research Notes*. 2019;12(1):2.
- 42 15. Gebreslasie K. Preterm Birth and Associated Factors among Mothers Who Gave Birth in  
43 Gondar Town Health Institutions. *Advances in Nursing*. 2016;2016.

- 1  
2  
3 1 16. Teklay G, Teshale T, Tasew H, Mariye T, Berihu H, Zeru T. Risk factors of preterm birth  
4 2 among mothers who gave birth in public hospitals of central zone, Tigray, Ethiopia: unmatched  
5 3 case-control study 2017/2018. *BMC Research Notes*. 2018;11(1):571.  
6 4 17. Bekele I, Demeke T, Dugna K. Prevalence of Preterm Birth and its Associated Factors  
7 5 among Mothers Delivered in Jimma University Specialized Teaching and Referral Hospital,  
8 6 Jimma Zone, Oromia Regional State, South West Ethiopia. *Journal of Women's Health Care*.  
9 7 2017;6(1).  
10 8 18. Bekele T, Amanon A, Gebreslasie KZ. Preterm birth and associated factors among  
11 9 mothers who gave birth in Debremarkos-town health institutions 2013 institutional  
12 10 based cross-sectional study. *Gynecology & Obstetrics (Sunnyvale)* 2015;5(5).  
13 11 19. Moher D, Shamseer L, Clarke M, Ghersi D, Liberati A, Petticrew M, et al. Preferred  
14 12 reporting items for systematic review and meta-analysis protocols (PRISMA-P) 2015 statement.  
15 13 *Systematic Reviews*. 2015;4(1).  
16 14 20. Moher D, Liberati A, Tetzlaff J, Altman DG. Preferred reporting items for systematic  
17 15 reviews and meta-analyses: the PRISMA statement. *Ann Intern Med*. 2009;151.  
18 16 21. Moher D, Liberati A, Tetzlaff J, Altman DG, Group P. Reprint—preferred reporting items  
19 17 for systematic reviews and meta-analyses: the PRISMA statement. *Physical therapy*.  
20 18 2009;89(9):873-80.  
21 19 22. Beller E, Glasziou P, Altman D, Hopewell S, Bastian H, Chalmers I, et al. PRISMA for  
22 20 abstracts: reporting systematic reviews in journal and conference abstracts. *PLoS Med*.  
23 21 2013;10(4).  
24 22 23. Moher D, Liberati A, Tetzlaff J, Altman D. Preferred reporting items for systematic  
25 23 reviews and meta-analyses: the PRISMA statement. *PLoS Med*. 2009;6(7).  
26 24 24. Joanna Briggs institute Reviewers' manual 2014 edition. Adelaide: Adelaide University;  
27 25 2014.  
28 26 25. Joanna Briggs institute reviewers' manual 2008.  
29 27 26. Higgins J, Hompson S. Quantifying heterogeneity in a meta-analysis 2002.

28

**PRISMA-P (Preferred Reporting Items for Systematic review and Meta-Analysis Protocols) 2015 checklist: recommended items to address in a systematic review protocol\***

| Section and topic                 | Item No | Checklist item                                                                                                                                                                                                                | (Page No.#) |
|-----------------------------------|---------|-------------------------------------------------------------------------------------------------------------------------------------------------------------------------------------------------------------------------------|-------------|
| <b>ADMINISTRATIVE INFORMATION</b> |         |                                                                                                                                                                                                                               |             |
| Title:                            |         |                                                                                                                                                                                                                               |             |
| Identification                    | 1a      | Identify the report as a protocol of a systematic review                                                                                                                                                                      | 1           |
| Update                            | 1b      | If the protocol is for an update of a previous systematic review, identify as such                                                                                                                                            | NA          |
| Registration                      | 2       | If registered, provide the name of the registry (such as PROSPERO) and registration number                                                                                                                                    | 2, 6        |
| Authors:                          |         |                                                                                                                                                                                                                               |             |
| Contact                           | 3a      | Provide name, institutional affiliation, e-mail address of all protocol authors; provide physical mailing address of corresponding author                                                                                     | 1           |
| Contributions                     | 3b      | Describe contributions of protocol authors and identify the guarantor of the review                                                                                                                                           | 13          |
| Amendments                        | 4       | If the protocol represents an amendment of a previously completed or published protocol, identify as such and list changes; otherwise, state plan for documenting important protocol amendments                               | NA          |
| Support:                          |         |                                                                                                                                                                                                                               |             |
| Sources                           | 5a      | Indicate sources of financial or other support for the review                                                                                                                                                                 | 12          |
| Sponsor                           | 5b      | Provide name for the review funder and/or sponsor                                                                                                                                                                             | NA          |
| Role of sponsor or funder         | 5c      | Describe roles of funder(s), sponsor(s), and/or institution(s), if any, in developing the protocol                                                                                                                            | NA          |
| <b>INTRODUCTION</b>               |         |                                                                                                                                                                                                                               |             |
| Rationale                         | 6       | Describe the rationale for the review in the context of what is already known                                                                                                                                                 | 4-6         |
| Objectives                        | 7       | Provide an explicit statement of the question(s) the review will address with reference to participants, interventions, comparators, and outcomes (PICO)                                                                      | 6           |
| <b>METHODS</b>                    |         |                                                                                                                                                                                                                               |             |
| Eligibility criteria              | 8       | Specify the study characteristics (such as PICO, study design, setting, time frame) and report characteristics (such as years considered, language, publication status) to be used as criteria for eligibility for the review | 6-7         |
| Information sources               | 9       | Describe all intended information sources (such as electronic databases, contact with study authors, trial registers or other grey literature sources) with planned dates of coverage                                         | 7           |
| Search strategy                   | 10      | Present draft of search strategy to be used for at least one electronic database, including planned limits, such that it could be repeated                                                                                    | 7           |

|                                    |     |                                                                                                                                                                                                                                                     |      |
|------------------------------------|-----|-----------------------------------------------------------------------------------------------------------------------------------------------------------------------------------------------------------------------------------------------------|------|
| Study records:                     |     |                                                                                                                                                                                                                                                     |      |
| Data management                    | 11a | Describe the mechanism(s) that will be used to manage records and data throughout the review                                                                                                                                                        | 6-10 |
| Selection process                  | 11b | State the process that will be used for selecting studies (such as two independent reviewers) through each phase of the review (that is, screening, eligibility and inclusion in meta-analysis)                                                     | 8-9  |
| Data collection process            | 11c | Describe planned method of extracting data from reports (such as piloting forms, done independently, in duplicate), any processes for obtaining and confirming data from investigators                                                              | 9    |
| Data items                         | 12  | List and define all variables for which data will be sought (such as PICO items, funding sources), any pre-planned data assumptions and simplifications                                                                                             | 9    |
| Outcomes and prioritization        | 13  | List and define all outcomes for which data will be sought, including prioritization of main and additional outcomes, with rationale                                                                                                                | 9    |
| Risk of bias in individual studies | 14  | Describe anticipated methods for assessing risk of bias of individual studies, including whether this will be done at the outcome or study level, or both; state how this information will be used in data synthesis                                | 8-10 |
| Data synthesis                     | 15a | Describe criteria under which study data will be quantitatively synthesised                                                                                                                                                                         | 10   |
|                                    | 15b | If data are appropriate for quantitative synthesis, describe planned summary measures, methods of handling data and methods of combining data from studies, including any planned exploration of consistency (such as I <sup>2</sup> , Kendall's τ) | 10   |
|                                    | 15c | Describe any proposed additional analyses (such as sensitivity or subgroup analyses, meta-regression)                                                                                                                                               | 10   |
|                                    | 15d | If quantitative synthesis is not appropriate, describe the type of summary planned                                                                                                                                                                  | 10   |
| Meta-bias(es)                      | 16  | Specify any planned assessment of meta-bias(es) (such as publication bias across studies, selective reporting within studies)                                                                                                                       | 10   |
| Confidence in cumulative evidence  | 17  | Describe how the strength of the body of evidence will be assessed (such as GRADE)                                                                                                                                                                  | 10   |

**\* It is strongly recommended that this checklist be read in conjunction with the PRISMA-P Explanation and Elaboration (cite when available) for important clarification on the items. Amendments to a review protocol should be tracked and dated. The copyright for PRISMA-P (including checklist) is held by the PRISMA-P Group and is distributed under a Creative Commons Attribution Licence 4.0.**

*From: Shamseer L, Moher D, Clarke M, Ghersi D, Liberati A, Petticrew M, Shekelle P, Stewart L, PRISMA-P Group. Preferred reporting items for systematic review and meta-analysis protocols (PRISMA-P) 2015: elaboration and explanation. BMJ. 2015 Jan 2;349(jan02 1):g7647.*

# BMJ Open

## The prevalence and associated factors of preterm birth in Ethiopia: Systematic review and meta-analysis protocol

|                                 |                                                                                                                                                                                                                                                                                                                                                                                                                                                                                                                                                                                                                                                               |
|---------------------------------|---------------------------------------------------------------------------------------------------------------------------------------------------------------------------------------------------------------------------------------------------------------------------------------------------------------------------------------------------------------------------------------------------------------------------------------------------------------------------------------------------------------------------------------------------------------------------------------------------------------------------------------------------------------|
| Journal:                        | <i>BMJ Open</i>                                                                                                                                                                                                                                                                                                                                                                                                                                                                                                                                                                                                                                               |
| Manuscript ID                   | bmjopen-2019-035574.R2                                                                                                                                                                                                                                                                                                                                                                                                                                                                                                                                                                                                                                        |
| Article Type:                   | Protocol                                                                                                                                                                                                                                                                                                                                                                                                                                                                                                                                                                                                                                                      |
| Date Submitted by the Author:   | 11-Mar-2020                                                                                                                                                                                                                                                                                                                                                                                                                                                                                                                                                                                                                                                   |
| Complete List of Authors:       | Muchie, Kindie Fentahun; Bahir Dar University, Epidemiology and Biostatistics<br>Molla, Ayenew; University of Gondar College of Medicine and Health Sciences, Epidemiology and Biostatistics;<br>Teshome, Destaw; University of Gondar College of Medicine and Health Sciences, Epidemiology and Biostatistics<br>Yenit, Melaku; University of Gondar, Epidemiology and Biostatistics<br>Sisay, Malede; University of Gondar College of Medicine and Health Sciences, Epidemiology and Biostatistics<br>Mekonnen, Fantahun Ayenew ; University of Gondar, Epidemiology and Biostatistics<br>Habitu, Yohanes Ayanaw; University of Gondar, Reproductive Health |
| <b>Primary Subject Heading</b>: | Public health                                                                                                                                                                                                                                                                                                                                                                                                                                                                                                                                                                                                                                                 |
| Secondary Subject Heading:      | Public health, Global health                                                                                                                                                                                                                                                                                                                                                                                                                                                                                                                                                                                                                                  |
| Keywords:                       | PUBLIC HEALTH, NEONATOLOGY, GYNAECOLOGY, OBSTETRICS                                                                                                                                                                                                                                                                                                                                                                                                                                                                                                                                                                                                           |
|                                 |                                                                                                                                                                                                                                                                                                                                                                                                                                                                                                                                                                                                                                                               |

SCHOLARONE™  
Manuscripts



I, the Submitting Author has the right to grant and does grant on behalf of all authors of the Work (as defined in the below author licence), an exclusive licence and/or a non-exclusive licence for contributions from authors who are: i) UK Crown employees; ii) where BMJ has agreed a CC-BY licence shall apply, and/or iii) in accordance with the terms applicable for US Federal Government officers or employees acting as part of their official duties; on a worldwide, perpetual, irrevocable, royalty-free basis to BMJ Publishing Group Ltd ("BMJ") its licensees and where the relevant Journal is co-owned by BMJ to the co-owners of the Journal, to publish the Work in this journal and any other BMJ products and to exploit all rights, as set out in our [licence](#).

The Submitting Author accepts and understands that any supply made under these terms is made by BMJ to the Submitting Author unless you are acting as an employee on behalf of your employer or a postgraduate student of an affiliated institution which is paying any applicable article publishing charge ("APC") for Open Access articles. Where the Submitting Author wishes to make the Work available on an Open Access basis (and intends to pay the relevant APC), the terms of reuse of such Open Access shall be governed by a Creative Commons licence – details of these licences and which [Creative Commons](#) licence will apply to this Work are set out in our licence referred to above.

Other than as permitted in any relevant BMJ Author's Self Archiving Policies, I confirm this Work has not been accepted for publication elsewhere, is not being considered for publication elsewhere and does not duplicate material already published. I confirm all authors consent to publication of this Work and authorise the granting of this licence.

## The prevalence and associated factors of preterm birth in Ethiopia: Systematic review and meta-analysis protocol

Kindie Fentahun Muchie<sup>1\*</sup>, Ayenew Molla Lakew<sup>2</sup>, Destaw Fetene Teshome<sup>2</sup>, Melaku Kindie Yenit<sup>2</sup>, Malede Mequanent Sisay<sup>2</sup>, Fantahun Ayenew Mekonnen<sup>2</sup>, Yohanes Ayanaw Habitu<sup>3</sup>

<sup>1</sup>Department of Epidemiology and Biostatistics, School of Public Health, College of Medicine and Health Sciences, Bahir Dar University, Bahir Dar, Ethiopia

<sup>2</sup>Department of Epidemiology and Biostatistics, Institute of Public Health, College of Medicine and Health Sciences, University of Gondar, Gondar, Ethiopia

<sup>3</sup>Department of Reproductive Health, Institute of Public Health, College of Medicine and Health Sciences, University of Gondar, Gondar, Ethiopia

### E-mail addresses:

KFM ([mkindief@gmail.com](mailto:mkindief@gmail.com)), AML ([mayenew15@gmail.com](mailto:mayenew15@gmail.com)), DFT  
([destaw.fetene@gmail.com](mailto:destaw.fetene@gmail.com)), MKY ([melaku98@gmail.com](mailto:melaku98@gmail.com)), MMS  
([maledecsa@gmail.com](mailto:maledecsa@gmail.com)), FAM ([fantahun.ayenew@yahoo.com](mailto:fantahun.ayenew@yahoo.com)), YAH  
([ayanawyohanes@yahoo.com](mailto:ayanawyohanes@yahoo.com))

### \*Correspondence



## ABSTRACT

**Introduction:** Preterm birth (PTB) complications are the leading cause of death among neonates globally. The reduction in neonatal mortality is not remarkable in Ethiopia. Therefore, this review will assess the magnitude and associated factors of PTB in Ethiopia.

**Methods and Analysis:** The preferred reporting items for systematic reviews and meta-analyses guideline will be followed during the systematic review. We will include all observational studies published from Jan 01, 2009 to Dec 31, 2019 that examined the level and/or associated factors of any type of PTB among livebirths in Ethiopia. Inclusion criteria will be all livebirths, PTB defined as delivery before 37 weeks' gestation. The primary outcome will be PTB < 37 weeks, and secondary outcomes including PTB < 34, < 32 and <28 weeks will be analyzed. PubMed, and Science Direct databases as well as Google search engine and Google Scholar will be searched. The pooled prevalence of preterm and effect size of association for associated factors will be analyzed using the Stata software version 14. The heterogeneity between studies will be measured by  $I^2$  statistics. A random-effects model will be used to estimate if heterogeneity detected. Publication bias will be assessed using a funnel plot. Subgroup analysis will be sought based on possible characteristics of the studies, specific morbidity (like pre-eclampsia, hypertension), type of PTB (spontaneous or iotrogenic), and quality of study (high quality or low risk). Meta-regression will be considered for major covariates (maternal age and maternal body mass index) related to PTB. Forest plots will be used to present the combined estimate with 95% confidence intervals. The quality of evidence of the outcomes will be assessed with the GRADE approach.

1  
2  
3 **Ethics and dissemination:** No ethical approval is necessary for this systematic review.  
4

5 The findings will be published in a peer-reviewed journal.  
6

7 **PROSPERO registration number:** CRD42017077356.  
8

9  
10 **Keywords:** Preterm birth, Prevalence, Associated Factors, Ethiopia, Systematic review,  
11  
12 Meta-analysis  
13  
14  
15  
16  
17  
18  
19  
20  
21  
22  
23  
24  
25  
26  
27  
28  
29  
30  
31  
32  
33  
34  
35  
36  
37  
38  
39  
40  
41  
42  
43  
44  
45  
46  
47  
48  
49  
50  
51  
52  
53  
54  
55  
56  
57  
58  
59  
60

For peer review only

## STRENGTHS AND LIMITATIONS OF THIS STUDY

- The proposed study will provide updated knowledge on the prevalence of preterm birth, leading cause of neonatal death, in Ethiopia where reduction in neonatal mortality is no remarkable.
- The proposed study will provide a comprehensive knowledge on the associated factors of preterm birth in Ethiopia.
- The PRISMA guideline will be followed during the proposed systematic review.
- Standard tool for critical appraisal and data extraction will be used
- Only quantitative observational studies published in English will be included.

## INTRODUCTION

Preterm birth (PTB) is a birth before 37 completed weeks of gestation (1). It is more prevalent in Africa and Asia. PTB complications remained the leading cause of under-5 and neonatal mortalities. PTB, the majority being spontaneously, occurs for a variety of reasons(2). Currently, World Health Organization (WHO) is committed to reduce the health problems and lives lost as a result of preterm births.

Globally, 14.9 million babies born preterm making a birth rate of 11.1%, ranging from 5% to 18%, in 2010 (3). The majority (60%) of these births occurred in sub-Saharan Africa and South Asia where 52% of global livebirths occur. The estimated global PTB rate was also 10.6%, 14.84 million live PTBs, in 2014 (4). Twelve million (81.1%) of these PTBs occurred in Asia and sub-Saharan Africa (4) showing the contribution is raised from 2010. Ethiopia is one of the low-middle incomes countries in Sub-Saharan Africa.

Preterm birth remains a crucial issue in child mortality and improving quality of maternal and newborn care(4). Complications of PTB is the leading cause of death among under 5 children with risk of dying ranged between 1.9 and 155.1 per 1,000 livebirths , in 2015 (5). In the same report, it had been found as the leading cause of death among neonates contributing for 0.944 million deaths. Complication of infants born preterm result in significant cost to the health sector, parents and the society in that preterm neonates take the first place for neonatal intensive care unit (NICU) admission and longer hospital stay globally (4).

Currently, WHO is committed to reduce the health problems and lives lost as a result of PTBs (6). Hence, WHO had developed new guidelines including interventions provided to the mother and the newborn baby (6). The Every Woman Every Child movement is

1  
2  
3 also aiming to intensify national and international commitment and action to ensure that  
4 women, children and adolescents are at the heart of development. The movement puts  
5 into action the global strategy (2016-2030) (7). The strategy is aimed to end all  
6 preventable deaths of women, children and adolescents within a generation and ensuring  
7 their well-being. Though Ethiopia achieved the millennium development goal 4 with 67%  
8 under-five mortality reduction from the 1990 estimate, the reduction in neonatal mortality  
9 is not remarkable (8). However, Ethiopia has planned to reduce neonatal mortality rate  
10 from 28 in 2015/16 to 10 by 2019/2020 (9). Furthermore, the country is also devoted to  
11 end preventable deaths of newborns and children under 5 years of age by 2030 (10).

12  
13  
14  
15  
16  
17  
18  
19  
20  
21  
22  
23  
24  
25  
26  
27  
28  
29  
30  
31  
32  
33  
34  
35  
36  
37  
38  
39  
40  
41  
42  
43  
44  
45  
46  
47  
48  
49  
50  
51  
52  
53  
54  
55  
56  
57  
58  
59  
60  
There are local studies on PTBs conducted in Ethiopia. The need for an accurate and  
reliable result (11, 12), a single study aggregating these studies is necessary for policy  
makers and implementers. Even though, there is a systematic review (13) done, it  
addressed only the effect of pregnancy induced hypertension and multiple pregnancies  
on preterm birth. However, literatures show that more factors affect PTB. Among some  
of the identified associated factors of PTB in Ethiopia are obstetric complication during  
the current pregnancy (14) specifically including pregnancy induced hypertension (15,  
16), premature rupture of membrane (17, 18) and hypertension during pregnancy (17);  
history of obstetric complications including history of abortion (17), history of still birth  
(17), history of low birth weight (17) and history of PTB (17); chronic illness (15, 18),  
nutritional status (14), anemia (18), antenatal care follow up (14, 16, 18), substance intake  
during pregnancy (17), multiple gestation (16, 17), and income status (18). Hence,  
conducting a systematic review and meta-analysis on PTB is paramount important in  
Ethiopia by updating the latest possible evidences.

1  
2  
3 Therefore this review is aimed at assessing the magnitude and associated factors of PTB  
4  
5 in Ethiopia.  
6

## 7 **METHODS AND ANALYSIS**

### 8 **Development of the review method**

9  
10 The methods of this systematic review and meta-analysis protocol was developed based  
11  
12 on the PRISMA Protocols (PRISMA-P) 2015 statement (19). The preferred reporting  
13  
14 items for systematic reviews and meta-analyses (PRISMA) guideline will be followed  
15  
16 during the systematic review(20, 21). The result of the review will be reported according  
17  
18 to the PRISMA guideline for reporting (22). The four phases that were drawn from the  
19  
20 PRISMA flow chart (23) will be documented in the results to show the study selection  
21  
22 process from initially identified records to finally included studies. The protocol for this  
23  
24 systematic review and meta-analysis is registered in international prospective register of  
25  
26 systematic reviews (PROSPERO) and obtained the registration number  
27  
28 (CRD42017064585). The initial anticipated or actual start date as well as anticipated  
29  
30 completion date were updated with brief details on PROSPERO records. We would like  
31  
32 to disclose that the update was not related to any problem to the present study.  
33  
34  
35  
36  
37  
38  
39

### 40 **Eligibility criteria**

41  
42 We will include all observational studies that examined the level and/or associated factors  
43  
44 of any type of PTB among livebirths in Ethiopia. Inclusion criteria will be all livebirths, PTB  
45  
46 defined as delivery before 37 weeks' gestation. The primary outcome will be PTB, with  
47  
48 PTB defined as a delivery occurring before 37 completed weeks of gestation. Other  
49  
50 relevant secondary outcomes to PTB will be considered including PTB < 34, < 32 or < 28  
51  
52 weeks. Reviews, editorials, case series and case reports on PTB as well as studies that  
53  
54  
55  
56  
57  
58  
59  
60

1  
2  
3 only reported qualitative findings on PTB will be excluded. In studies that reported both  
4 quantitative and qualitative results, we will only consider the quantitative findings. Studies  
5 will be considered relevant if they assessed the magnitude of PTB and/or examined the  
6 associated factors of preterm birth. Regarding magnitude, only those studies that reported  
7 percentages out of livebirths will be eligible.  
8  
9  
10  
11  
12  
13

### 14 **Search strategy**

15 Major medical electronic databases such as PubMed, and Science Direct will be searched  
16 to identify relevant literature for the review. To cover grey literature, we will hand-search  
17 literature using the Google search engine and Google Scholar and references of  
18 electronically identified articles. Further, references list will also be considered from  
19 relevant studies considered for critical appraisal.  
20  
21  
22  
23  
24  
25  
26

27 The literature search will be carried out by the primary author (KFM). The search will be  
28 limited to humans, and journal studies published in English from Jan 01, 2009 to Dec 31,  
29 2019. We will apply Medical Subject Headings (MeSH) terms from PubMed, and  
30 combined key words to identify studies in the databases.  
31  
32  
33  
34  
35  
36

37 Accordingly, literatures will be retrieved using the exact search phrase (*"Premature  
38 Birth/epidemiology"[Mesh] OR "Premature Birth/etiology"[Mesh] OR "Premature  
39 Birth/statistics and numerical data"[Mesh] OR premature birth\* [MeSH] OR preterm birth  
40 OR premature birth OR preterm labo\* OR preterm deliver\* OR preterm infant OR preterm  
41 neonate\* OR preterm newborn\* OR birth outcome OR pregnancy outcome\$ OR  
42 pregnancy complication\$ OR birth outcome\$ OR birth complication\$) AND Ethiopia AND  
43 ((incidence OR prevalence OR magnitude OR burden) OR (predict\* OR associated  
44  
45  
46  
47  
48  
49  
50  
51  
52  
53  
54  
55  
56  
57  
58  
59  
60*

1  
2  
3 *factor\* OR risk factor\* OR determinant\*))* from PubMed. This will be customized for other  
4  
5 databases.

### 8 **Study selection process**

9  
10 The retrieved studies will be exported to the citation manager (EndNote) and then  
11  
12 duplicates excluded. The titles and abstracts of the studies will be reviewed for screening  
13  
14 by two authors (KFM and AML) for obvious exclusion according to the eligibility/inclusion  
15  
16 criteria. Based on this screening, the titles and abstracts of the studies will be classified  
17  
18 as included, excluded, and undecided. Full text of all the included and the undecided  
19  
20 studies will be searched for further eligibility assessment.

21  
22  
23 The full texts of the included and undecided categories of the studies will be independently  
24  
25 reviewed by two authors (KFM and AML) against the eligibility criteria for final inclusion.  
26  
27 Studies that are not eligible based on the examination of the full-text will be excluded by  
28  
29 stating the reasons according to the inclusion criteria. Disagreements between the two  
30  
31 reviewers will be resolved through discussion and consensus.

32  
33  
34 Studies deemed to be appropriate will be scanned in full to determine relevance.  
35  
36 Secondly, the references lists of all relevant studies will be reviewed to find additional  
37  
38 studies that may have been difficult to detect in the database search due to non-reporting  
39  
40 in the abstract (possibly due to non-significant effects). Studies published by the same  
41  
42 team will be carefully reviewed to ensure the results of a given study are not included  
43  
44 twice in this review.

### 48 **Critical appraisal**

49  
50 All of the included studies will be critically appraised for their validity. The three authors  
51  
52 (DFT, MKY, FA) will check the methodological robustness and validity of the findings  
53  
54



1  
2  
3 using the Joanna Briggs Institute (JBI) Meta-Analysis of Statistics Assessment and  
4 Review Instrument (24). Uncertainties will be resolved by joint discussion between the  
5 reviewers. Disagreements among the reviewers will be resolved through discussion and  
6 consensus.  
7  
8  
9

10  
11  
12 The JBI Meta-Analysis of Statistics Assessment and Review Instrument (JBI-MAStARI)  
13 will be used for critical appraisal (25). This tool contains a separate appraisal checklist for  
14 each type of the study design. The reviewers will independently assess articles prior to  
15 inclusion in the final review using this instrument. Any disagreement among the reviewers  
16 will be resolved through discussion, and by involving another reviewer. A Study with  
17 quality assessment score of 50% and above and a study having a response rate of 80%  
18 and above were included in the final review.  
19  
20  
21  
22  
23  
24  
25  
26  
27

### 28 **Data extraction**

29  
30  
31 The JBI data extraction form will be used to extract the characteristics of the studies and  
32 prevalence of preterm birth (primary outcome and secondary outcomes) as well as Odds  
33 ratio. A standardized excel sheet will be created and information from the standardized  
34 review forms will be transferred in order to be readily available for the systematic review.  
35  
36  
37  
38  
39  
40 Three reviewers (KFM, MMS and AML) will extract data independently. Disagreements  
41 among the reviewers were resolved through discussion and consensus.  
42  
43

44  
45 This tool will include information on the author, year of publication, objective, study  
46 setting, year of survey, study design, sample size, data collection method, study  
47 participants, definition used for preterm birth, prevalence of preterm, 95% CI for  
48 prevalence of preterm birth, and list of associated factors with their effect size. A  
49  
50  
51  
52  
53  
54  
55  
56  
57

1  
2  
3 quantitative data of cross-tabulation between the subject's characteristics (associated  
4 factors) and the preterm birth will also systematically abstracted.  
5  
6

### 7 **Data synthesis and statistical analysis**

8  
9  
10 The individual studies will be concisely described using a summary table. The summary  
11 table particularly describes the characteristics of the included studies and the main  
12 findings.  
13  
14  
15

16  
17 The data will be analyzed by the Stata software version 14. For studies which did not  
18 present a standard error (SE), it will be calculated using the formula;  $SE = \sqrt{(p \times (1-p)/n)}$ .  
19

20  
21 The calculated standard error and prevalence rate of each study will then entered into  
22 Stata software to calculate the overall prevalence and its 95% confidence interval (CI).  
23  
24

25  
26 Similarly, the relationship between factors and preterm birth will be summarized using  
27 statistical estimates of effect sizes, odds ratio. Subgroup analysis will be sought based  
28 on possible characteristics of the studies, specific morbidity (like pre-eclampsia,  
29 hypertension), type of PTB (spontaneous or iotrogenic), and quality of study (high quality  
30 or low risk). Meta-regression will be considered for major covariates (maternal age and  
31 maternal body mass index) related to PTB. Meta-regression will be considered for major  
32 covariates (maternal age and maternal body mass index) related to PTB.  
33  
34  
35  
36  
37  
38  
39  
40  
41

42 The level of heterogeneity among the studies will be quantified using the  $I^2$  statistics (26).  
43  
44  
45  
46  
47  
48  
49  
50  
51  
52  
53  
54  
55  
56  
57  
58  
59  
60

1  
2  
3 fill technique will be considered for substantial publication bias. Further, sensitivity  
4  
5 analysis will be used to assess the influential studies on the pooled estimate.  
6

7  
8 Forest plots will be used to present the combined estimate with 95% CI. The quality of evidence  
9  
10 of the outcomes will be assessed with the GRADE approach. If no more than one study  
11  
12 will be found for each of the objective, then the finding will be synthesized narratively.  
13

### 14 **Potential limitations**

15  
16 Only quantitative observational studies published in English will be included. This might  
17  
18 exclude studies those published in other languages. Further, qualitative studies that  
19  
20 assessed the associated factors might be excluded. Therefore, the readers are advised  
21  
22 to take this into account.  
23  
24

### 25 **Patient and public involvement**

26  
27 It was not appropriate to involve patients or the public in the design, or conduct, or  
28  
29 reporting, or dissemination plans of our research as no individual information will be  
30  
31 discussed.  
32  
33

### 34 **Ethics and dissemination**

35  
36 The review will be based on published data, and thus there is no requirement for ethical  
37  
38 approval. The results will be disseminated through publication in a peer reviewed journal,  
39  
40 and through presentations at academic conferences.  
41  
42

## 43 **DISCUSSION**

44  
45 It is crucial to know the importance of preterm birth and contributing factors considering  
46  
47 the latest statistics in a country. Hence, this review will present on the country wide  
48  
49 magnitude of preterm birth and the associated factors of preterm birth. The result will  
50  
51 provide information to guide health professionals and health policy makers for monitoring  
52  
53  
54  
55  
56  
57

1  
2  
3 preterm birth strategy and applying necessary preventive and appropriate measures to  
4  
5 decrease preterm birth.  
6

## 7 **Abbreviations**

8  
9  
10 ACTION: Antenatal Corticosteroids for Improving Outcomes in preterm Newborns

11  
12 CI: Confidence Interval

13  
14 JBI: Joanna Briggs Institute

15  
16 JBI-MAStARI: JBI Meta-Analysis of Statistics Assessment and Review Instrument

17  
18 KMC: Kangaroo Mother Care

19  
20 LMICs: Low and Middle Income Countries

21  
22 MeSH: Medical Subject Headings

23  
24 NICU: Neonatal Intensive Care Unit

25  
26 NMR: Neonatal Mortality Rate

27  
28 PRISMA: Preferred Reporting Items for Systematic Reviews and Meta-analyses

29  
30 PRISMA-P: Preferred Reporting Items for Systematic Reviews and Meta-analyses

31  
32 Protocol

33  
34 PROSPERO: Prospective Register of Systematic Reviews

35  
36 PTB: Preterm Birth

37  
38 SE: Standard Error

39  
40 WHO: World Health Organization

## 41 **Declarations**

### 42 ***Consent for publication***

43  
44 Not applicable.  
45  
46  
47  
48  
49  
50  
51  
52  
53  
54  
55  
56  
57  
58  
59  
60

### **Availability of data and materials**

Not applicable.

### **Competing interests**

The authors declare that they have no competing interests

### **Funding**

None.

### **Author contributions**

KFM, MKY, YAH contributed to the conception of the research protocol. KFM, AML, DFT, MMS, FAM designed the study. KFM, DFT, AML reviewed the literature, and wrote the protocol. KFM, AML, DFT, MKY, FAM, MMS, and YAH reviewed and rewrote the protocol.

All authors read and approved the final manuscript.

### **References**

1. Who: Recommended Definitions, Terminology and Format for Statistical Tables Related to The Perinatal Period And Use of A New Certificate For Cause of Perinatal Deaths. *Acta Obstetricia et Gynecologica Scandinavica*. 1977;56(3):247-53.
2. March of Dimes, PMNCH, Save the Children, WHO. Born Too Soon: The Global action report on preterm Birth. In: Eds CP Howson, MV Kinney, JE Lawn, editors. Geneva: World Health Organization; 2012.
3. Blencowe H, Cousens S, Oestergaard MZ, Chou D, Moller A-B, Narwal R, et al. National, regional, and worldwide estimates of preterm birth rates in the year 2010 with time trends since 1990 for selected countries: a systematic analysis and implications. *The Lancet*. 2012;379(9832):2162-72.
4. Chawanpaiboon S, Vogel JP, Moller A-B, Lumbiganon P, Petzold M, Hogan D, et al. Global, regional, and national estimates of levels of preterm birth in 2014: a systematic review and modelling analysis. *The Lancet Global Health*. 2019;7(1):e37-e46.
5. Liu L, Oza S, Hogan D, Chu Y, Perin J, Zhu J, et al. Global, regional, and national causes of under-5 mortality in 2000-15: an updated systematic analysis with implications for the Sustainable Development Goals. *The Lancet*. 2016;388(10063):3027-35.
6. WHO. WHO Fact sheets on Preterm birth In: WHO, editor. 2018.
7. Every Woman Every Child. The global strategy for women's, children's, and adolescents' health (2016-2030): Survive, thrive, transform. In: Every Woman Every Child, editor. 2015.
8. Ruducha J, Mann C, Singh NS, Gemebo TD, Tessema NS, Baschieri A, et al. How Ethiopia achieved Millennium Development Goal 4 through multisectoral interventions: a Countdown to 2015 case study. *The Lancet Global Health*. 2017;5(11):e1142-e51.
9. The Federal Democratic Republic of Ethiopia Ministry of Health. Health Sector Transformation Plan. 2015.
10. United Nations. Sustainable Development Goals. Secretary-General. 2015.

11. Cohn LD, Becker BJ. How meta-analysis increases statistical power. *Psychological Methods*. 2003;8(3):243-53.
12. Noble JH, Jr. Meta-analysis: Methods, strengths, weaknesses, and political uses. *The Journal of Laboratory and Clinical Medicine*. 2006;147(1):7-20.
13. Muluaem G, Wondim A, Woretaw A. The effect of pregnancy induced hypertension and multiple pregnancies on preterm birth in Ethiopia: a systematic review and meta-analysis. *BMC Research Notes*. 2019;12(1):91.
14. Mekonen DG, Yismaw AE, Nigussie TS, Ambaw WM. Proportion of Preterm birth and associated factors among mothers who gave birth in Debretabor town health institutions, northwest, Ethiopia. *BMC Research Notes*. 2019;12(1):2.
15. Gebreslasie K. Preterm Birth and Associated Factors among Mothers Who Gave Birth in Gondar Town Health Institutions. *Advances in Nursing*. 2016;2016.
16. Teklay G, Teshale T, Tasew H, Mariye T, Berihu H, Zeru T. Risk factors of preterm birth among mothers who gave birth in public hospitals of central zone, Tigray, Ethiopia: unmatched case-control study 2017/2018. *BMC Research Notes*. 2018;11(1):571.
17. Bekele I, Demeke T, Dugna K. Prevalence of Preterm Birth and its Associated Factors among Mothers Delivered in Jimma University Specialized Teaching and Referral Hospital, Jimma Zone, Oromia Regional State, South West Ethiopia. *Journal of Women's Health Care*. 2017;6(1).
18. Bekele T, Amanon A, Gebreslasie KZ. Preterm birth and associated factors among mothers who gave birth in Debremarkos-town health institutions 2013 institutional based cross-sectional study. *Gynecology & Obstetrics (Sunnyvale)* 2015;5(5).
19. Moher D, Shamseer L, Clarke M, Ghersi D, Liberati A, Petticrew M, et al. Preferred reporting items for systematic review and meta-analysis protocols (PRISMA-P) 2015 statement. *Systematic Reviews*. 2015;4(1).
20. Moher D, Liberati A, Tetzlaff J, Altman DG. Preferred reporting items for systematic reviews and meta-analyses: the PRISMA statement. *Ann Intern Med*. 2009;151.
21. Moher D, Liberati A, Tetzlaff J, Altman DG, Group P. Reprint—preferred reporting items for systematic reviews and meta-analyses: the PRISMA statement. *Physical therapy*. 2009;89(9):873-80.
22. Beller E, Glasziou P, Altman D, Hopewell S, Bastian H, Chalmers I, et al. PRISMA for abstracts: reporting systematic reviews in journal and conference abstracts. *PLoS Med*. 2013;10(4).
23. Moher D, Liberati A, Tetzlaff J, Altman D. Preferred reporting items for systematic reviews and meta-analyses: the PRISMA statement. *PLoS Med*. 2009;6(7).
24. Joanna Briggs institute Reviewers' manual 2014 edition. Adelaide: Adelaide University; 2014.
25. Joanna Briggs institute reviewers' manual 2008.
26. Higgins J, Hompson S. Quantifying heterogeneity in a meta-analysis 2002.

**PRISMA-P (Preferred Reporting Items for Systematic review and Meta-Analysis Protocols) 2015 checklist: recommended items to address in a systematic review protocol\***

| Section and topic                 | Item No | Checklist item                                                                                                                                                                                                                | (Page No.#) |
|-----------------------------------|---------|-------------------------------------------------------------------------------------------------------------------------------------------------------------------------------------------------------------------------------|-------------|
| <b>ADMINISTRATIVE INFORMATION</b> |         |                                                                                                                                                                                                                               |             |
| Title:                            |         |                                                                                                                                                                                                                               |             |
| Identification                    | 1a      | Identify the report as a protocol of a systematic review                                                                                                                                                                      | 1           |
| Update                            | 1b      | If the protocol is for an update of a previous systematic review, identify as such                                                                                                                                            | NA          |
| Registration                      | 2       | If registered, provide the name of the registry (such as PROSPERO) and registration number                                                                                                                                    | 3, 7        |
| Authors:                          |         |                                                                                                                                                                                                                               |             |
| Contact                           | 3a      | Provide name, institutional affiliation, e-mail address of all protocol authors; provide physical mailing address of corresponding author                                                                                     | 1           |
| Contributions                     | 3b      | Describe contributions of protocol authors and identify the guarantor of the review                                                                                                                                           | 14          |
| Amendments                        | 4       | If the protocol represents an amendment of a previously completed or published protocol, identify as such and list changes; otherwise, state plan for documenting important protocol amendments                               | NA          |
| Support:                          |         |                                                                                                                                                                                                                               |             |
| Sources                           | 5a      | Indicate sources of financial or other support for the review                                                                                                                                                                 | 14          |
| Sponsor                           | 5b      | Provide name for the review funder and/or sponsor                                                                                                                                                                             | NA          |
| Role of sponsor or funder         | 5c      | Describe roles of funder(s), sponsor(s), and/or institution(s), if any, in developing the protocol                                                                                                                            | NA          |
| <b>INTRODUCTION</b>               |         |                                                                                                                                                                                                                               |             |
| Rationale                         | 6       | Describe the rationale for the review in the context of what is already known                                                                                                                                                 | 5-6         |
| Objectives                        | 7       | Provide an explicit statement of the question(s) the review will address with reference to participants, interventions, comparators, and outcomes (PICO)                                                                      | 7           |
| <b>METHODS</b>                    |         |                                                                                                                                                                                                                               |             |
| Eligibility criteria              | 8       | Specify the study characteristics (such as PICO, study design, setting, time frame) and report characteristics (such as years considered, language, publication status) to be used as criteria for eligibility for the review | 7-8         |
| Information sources               | 9       | Describe all intended information sources (such as electronic databases, contact with study authors, trial registers or other grey literature sources) with planned dates of coverage                                         | 8           |
| Search strategy                   | 10      | Present draft of search strategy to be used for at least one electronic database, including planned limits, such that it could be repeated                                                                                    | 8-9         |

|                                    |     |                                                                                                                                                                                                                                                  |       |
|------------------------------------|-----|--------------------------------------------------------------------------------------------------------------------------------------------------------------------------------------------------------------------------------------------------|-------|
| Study records:                     |     |                                                                                                                                                                                                                                                  |       |
| Data management                    | 11a | Describe the mechanism(s) that will be used to manage records and data throughout the review                                                                                                                                                     | 6-10  |
| Selection process                  | 11b | State the process that will be used for selecting studies (such as two independent reviewers) through each phase of the review (that is, screening, eligibility and inclusion in meta-analysis)                                                  | 7-10  |
| Data collection process            | 11c | Describe planned method of extracting data from reports (such as piloting forms, done independently, in duplicate), any processes for obtaining and confirming data from investigators                                                           | 10-11 |
| Data items                         | 12  | List and define all variables for which data will be sought (such as PICO items, funding sources), any pre-planned data assumptions and simplifications                                                                                          | 10-11 |
| Outcomes and prioritization        | 13  | List and define all outcomes for which data will be sought, including prioritization of main and additional outcomes, with rationale                                                                                                             | 7     |
| Risk of bias in individual studies | 14  | Describe anticipated methods for assessing risk of bias of individual studies, including whether this will be done at the outcome or study level, or both; state how this information will be used in data synthesis                             | 11-12 |
| Data synthesis                     | 15a | Describe criteria under which study data will be quantitatively synthesised                                                                                                                                                                      | 12    |
|                                    | 15b | If data are appropriate for quantitative synthesis, describe planned summary measures, methods of handling data and methods of combining data from studies, including any planned exploration of consistency (such as $I^2$ , Kendall's $\tau$ ) | 11-12 |
|                                    | 15c | Describe any proposed additional analyses (such as sensitivity or subgroup analyses, meta-regression)                                                                                                                                            | 11-12 |
|                                    | 15d | If quantitative synthesis is not appropriate, describe the type of summary planned                                                                                                                                                               | 12    |
| Meta-bias(es)                      | 16  | Specify any planned assessment of meta-bias(es) (such as publication bias across studies, selective reporting within studies)                                                                                                                    | 11-12 |
| Confidence in cumulative evidence  | 17  | Describe how the strength of the body of evidence will be assessed (such as GRADE)                                                                                                                                                               | 12    |

**\* It is strongly recommended that this checklist be read in conjunction with the PRISMA-P Explanation and Elaboration (cite when available) for important clarification on the items. Amendments to a review protocol should be tracked and dated. The copyright for PRISMA-P (including checklist) is held by the PRISMA-P Group and is distributed under a Creative Commons Attribution Licence 4.0.**

*From: Shamseer L, Moher D, Clarke M, Ghersi D, Liberati A, Petticrew M, Shekelle P, Stewart L, PRISMA-P Group. Preferred reporting items for systematic review and meta-analysis protocols (PRISMA-P) 2015: elaboration and explanation. BMJ. 2015 Jan 2;349(jan02 1):g7647.*
